# Supplementary material
Source: PubMed Central journal article supplement (PMC5560817)
Supplement: 2207File001.pdf [file 2207File001.pdf]

## Supplementary Information

### An Essential Regulatory System Originating from Polygenic Transcriptional Rewiring of PhoP-PhoQ of *Xanthomonas campestris*

Bao-Yu Peng,<sup>†, ‡, ¶</sup> Yue Pan,<sup>†, ‡, ¶</sup> Ru-Jiao Li,<sup>§, ¶</sup> Jin-Wei Wei,<sup>†, ‡</sup> Fang Liang,<sup>§</sup> Li Wang,<sup>†</sup>  
Fang-Fang Wang,<sup>†</sup> and Wei Qian<sup>†,1</sup>

<sup>†</sup> *State Key Laboratory of Plant Genomics, Institute of Microbiology, Chinese Academy of Sciences, Beijing 100101, China*

<sup>‡</sup> *School of Biological Sciences, University of Chinese Academy of Sciences, Beijing 100049, China*

<sup>§</sup> *Beijing Institute of Genomics, Chinese Academy of Sciences, Beijing 100101, China*

<sup>¶</sup> These authors contributed equally to this work.

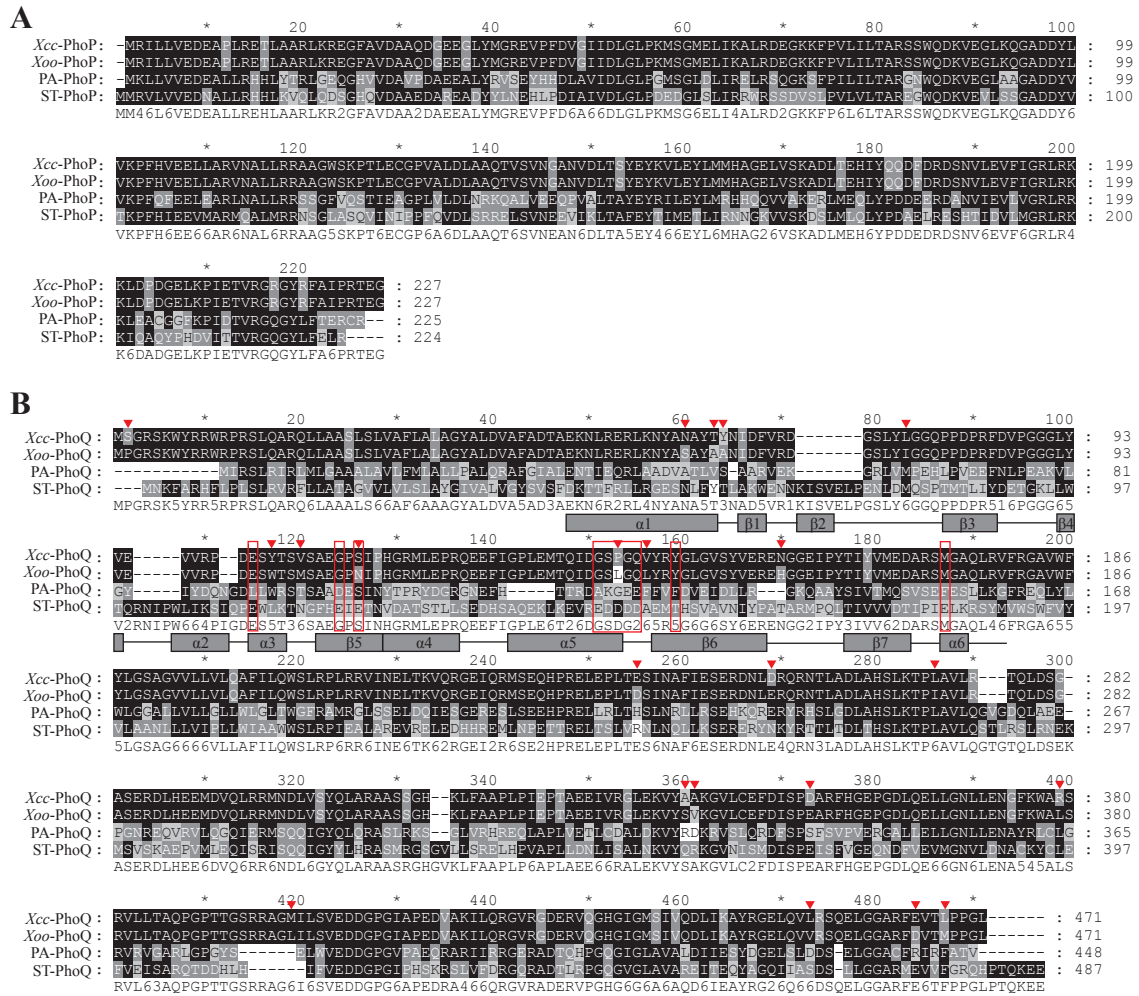

**Figure S1** Genetic polymorphisms in PhoP-PhoQ orthologues. (A) Alignment of PhoP protein sequences. *Xcc*: *X. campestris* pv. *campestris*. *Xoo*: *X. oryzae* pv. *oryzae*. *ST*: *Salmonella enterica*. *PA*: *Pseudomonas aeruginosa*. (B) Alignments of PhoQ protein sequences. The secondary structure of the sensor domain from *ST*-PhoQ is depicted below the sequences, and the corresponding amino acid residue sites between *Xcc*-PhoQ and *Xoo*-PhoQ in each sequence are labelled with a small red triangle above the sequenCCces. Residues that make up the *ST*-PhoQ acidic patch are shown in red boxes.

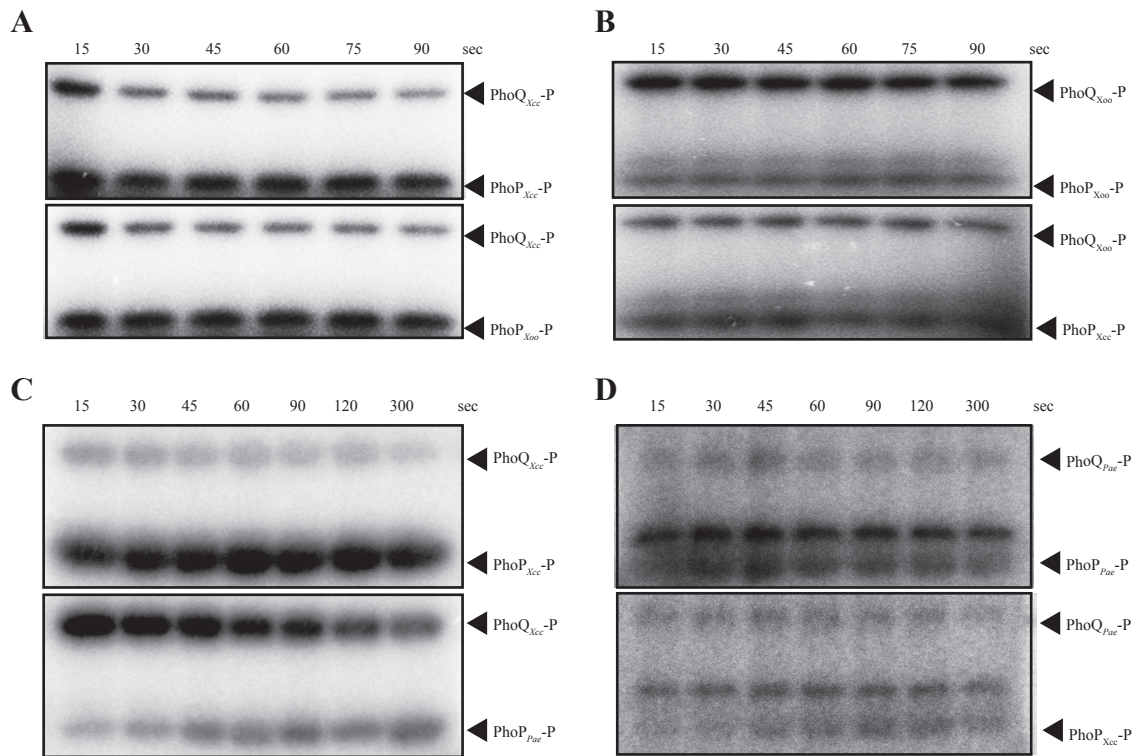

**Figure S2** *in vitro* phosphorylation assay of PhoP-PhoQ from different bacteria. (A) Full-length PhoQ<sub>Xcc</sub> phosphorylates PhoP<sub>Xcc</sub> and PhoP<sub>Xoo</sub>, respectively. (B) Full-length PhoQ<sub>Xoo</sub> phosphorylates PhoP<sub>Xcc</sub> and PhoP<sub>Xoo</sub>, respectively. (C) Full-length PhoQ<sub>Xcc</sub> phosphorylates PhoP<sub>Xcc</sub> and PhoP<sub>Pae</sub>, respectively. (D) Full-length PhoQ<sub>Pae</sub> phosphorylates PhoP<sub>Pae</sub> and PhoP<sub>Xcc</sub>, respectively. In (A-D), inverted membrane vesicles (IMVs) of PhoQ (10  $\mu$ g) were co-incubated with [ $\gamma$ -<sup>32</sup>P]ATP for 20 min, and 10  $\mu$ M PhoP was then added to the reaction mixtures. Aliquots were taken at the indicated times. The reactions were stopped by adding 5  $\mu$ l of 5  $\times$  SDS PAGE loading buffer. The experiments were repeated three times and a representative is shown.

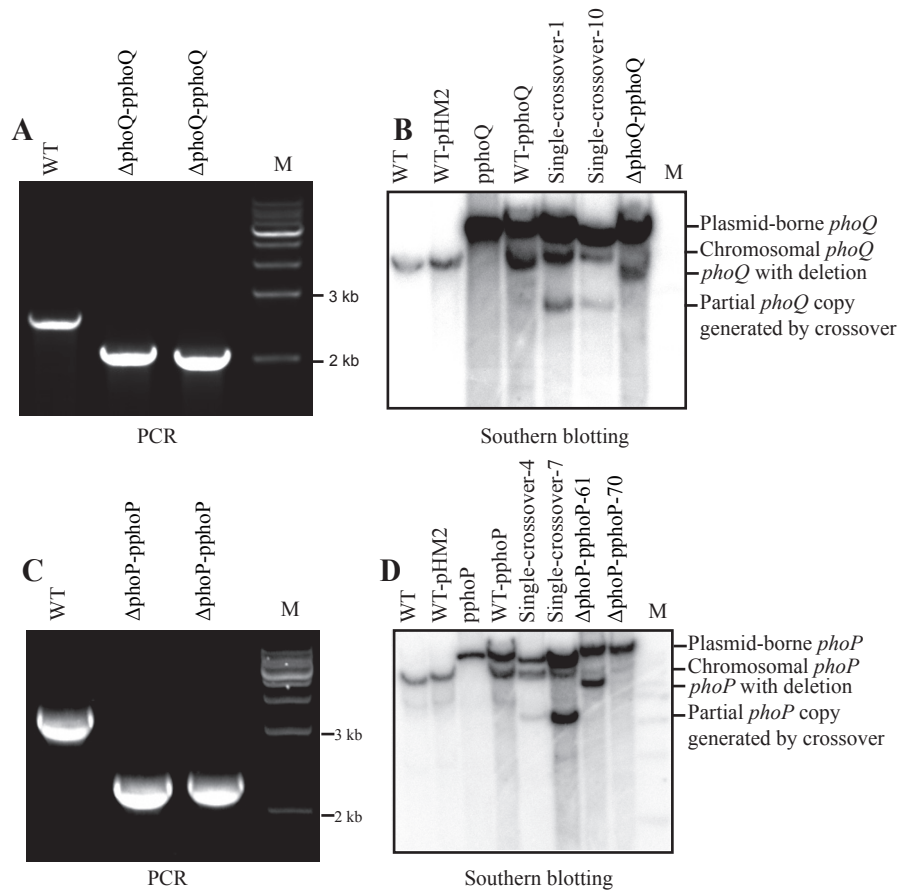

**Figure S3** Genetic verification of *phoP*<sub>Xcc</sub> and *phoQ*<sub>Xcc</sub> mutants. (A) Verification of the *phoQ*<sub>Xcc</sub> mutant by PCR. (B) Verification of the *phoQ*<sub>Xcc</sub> mutant by Southern blotting. (C) Verification of the *phoP*<sub>Xcc</sub> mutant by PCR. (D) Verification of the *phoP*<sub>Xcc</sub> mutant by Southern blotting. WT: *X. campestris* pv. *campestris* 8004.  $\Delta$ phoQ-pphoQ: the putative *phoQ*<sub>Xcc</sub> in-frame deletion mutant.  $\Delta$ phoP-pphoP-61 and  $\Delta$ phoP-pphoP-70: putative *phoP*<sub>Xcc</sub> in-frame deletion mutants. WT-pHM2: the wild-type strain containing an empty pHM2 vector. WT-pphoP: the wild-type strain containing a plasmid copy of *phoP*<sub>Xcc</sub>. WT-pphoQ: the wild-type strain containing a plasmid copy of *phoQ*<sub>Xcc</sub>. Single-crossover-4, -7, -1 and -10 are recombinant constructs obtained by the first round of homologous cross-over of *phoP*<sub>Xcc</sub> and *phoQ*<sub>Xcc</sub>. Note that the candidate for  $\Delta$ phoP-pphoP-70 was a false positive construct, which was verified by Southern blotting in (D). The primer sequences in (A) and (C) are listed in Table S2. In (B) and (D), bacterial DNA was digested with *Kpn*I. The *phoP*<sub>Xcc</sub> and *phoQ*<sub>Xcc</sub> PCR products were labelled with [ $\alpha$ -<sup>32</sup>P]dCTP and used as probes. A 1-kb DNA marker was used to indicate the band size in both the PCR and Southern blotting assays.

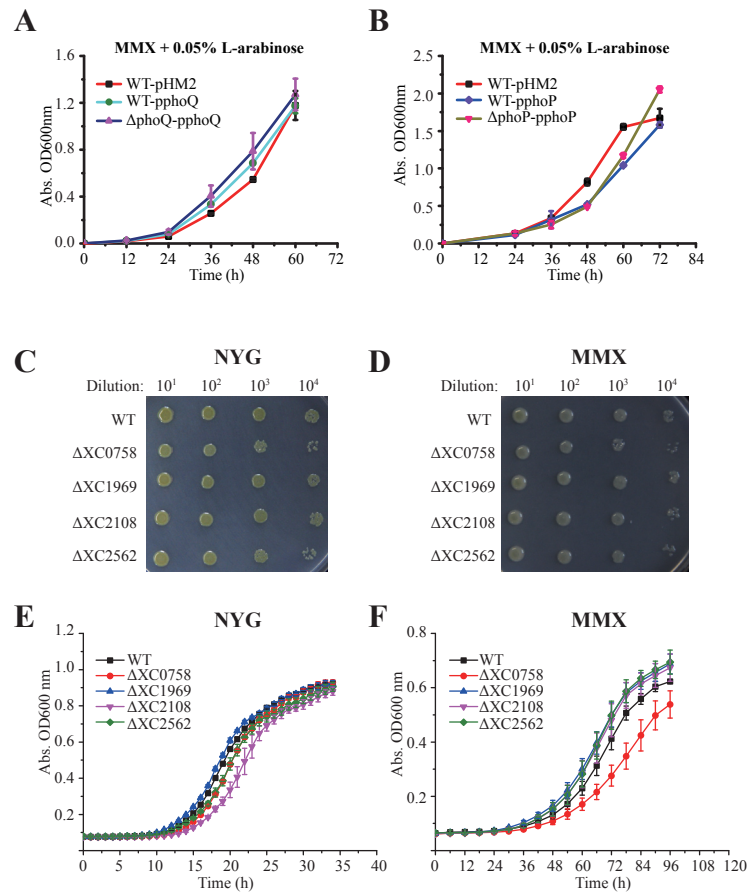

**Figure S4.** Bacterial growth in the MMX medium with L-arabinose. (A) Growth curve of the  $phoP_{Xcc}$  mutant of *X. campestris* pv. *campestris* in MMX with 0.05% L-arabinose. (B) Growth curve of the  $phoP_{Xcc}$  mutant in MMX with 0.05% L-arabinose. WT-pHM2: the wild-type strain containing an empty pHM2 vector. WT-pphoP and WT-pphoQ: the wild-type strains containing plasmid copies of  $phoP_{Xcc}$  and  $phoQ_{Xcc}$ , respectively. ΔphoP-pphoP and ΔphoQ-pphoQ are in-frame deletion mutants of  $phoP_{Xcc}$  and  $phoQ_{Xcc}$ , respectively. All bacterial strains were grown at 28°C. Error bars indicate the standard deviation ( $n = 4$ ). (C) Morphology of bacterial strains grown on rich NYG agar. (D) Morphology of bacterial strains grown on minimal MMX agar. In (C and D) 1 μl of bacterial culture was inoculated on the agar plates and grown for 36-48 hours. (E) Growth curves of bacterial strains in rich NYG medium. (F) Growth curves of bacterial strains in minimal MMX medium. In (E and F), each data point is the average of 3 repeated experiments, and the vertical bars indicate standard deviation.

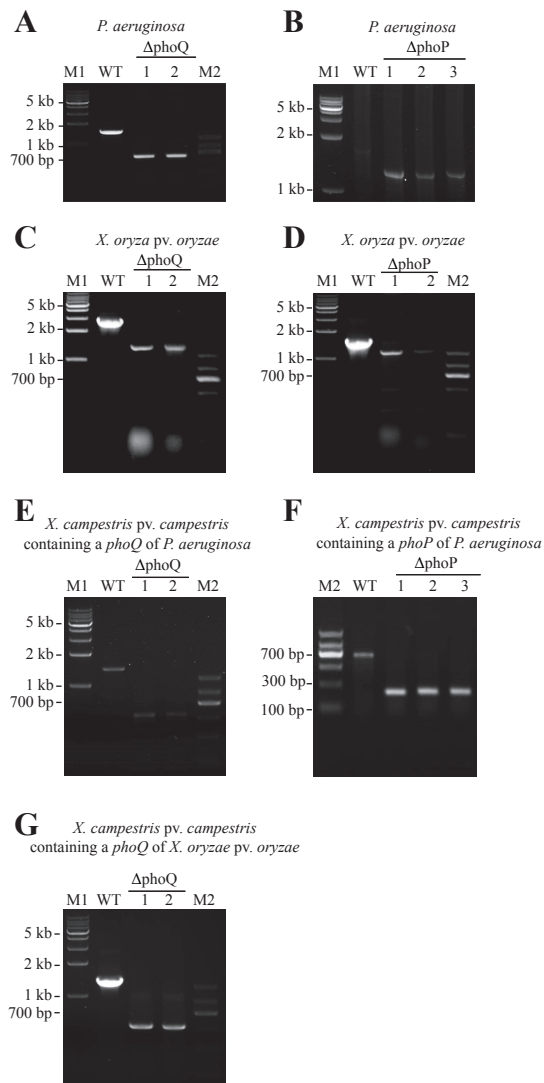

**Figure S5.** Verification of the *phoP* and *phoQ* in-frame deletion mutants of various bacteria. (A and B) Verification of the *phoP* and *phoQ* mutants of *P. aeruginosa* PAO1. (C and D) Verification of the *phoP* and *phoQ* mutants of *X. oryzae* pv. *oryzae* PXO99. An additional vector-borne copy of either *phoP* or *phoQ* was transformed into the wild-type strain before the deletion of the chromosomal copy. (E and F) *phoP* and *phoQ* of *P. aeruginosa* PAO1 are genetically equivalent to their orthologues in *X. campestris* pv. *campestris*. An additional vector-borne copy of either *phoP* or *phoQ* of *P. aeruginosa* PAO1 was transformed into wild-type strain of *X. campestris* pv. *campestris* before deletion of the chromosomal copy. (G) *phoQ* of *X. oryzae* pv. *oryzae* is genetically equivalent to its orthologues in *X. campestris* pv. *campestris*. An additional vector-borne copy of *phoQ* of *X. oryzae* pv. *oryzae* was transformed into the wild-type strain of *X. campestris* pv. *campestris* before the deletion of the chromosomal copy. In (A-G), 1, 2, and 3 indicate the recombinant strains obtained. PCR amplification of the *phoP* or *phoQ* gene of various bacterial strains was conducted to determine the correction of gene deletion. M1: 1 kb ladder. M2: 100 bp ladder.

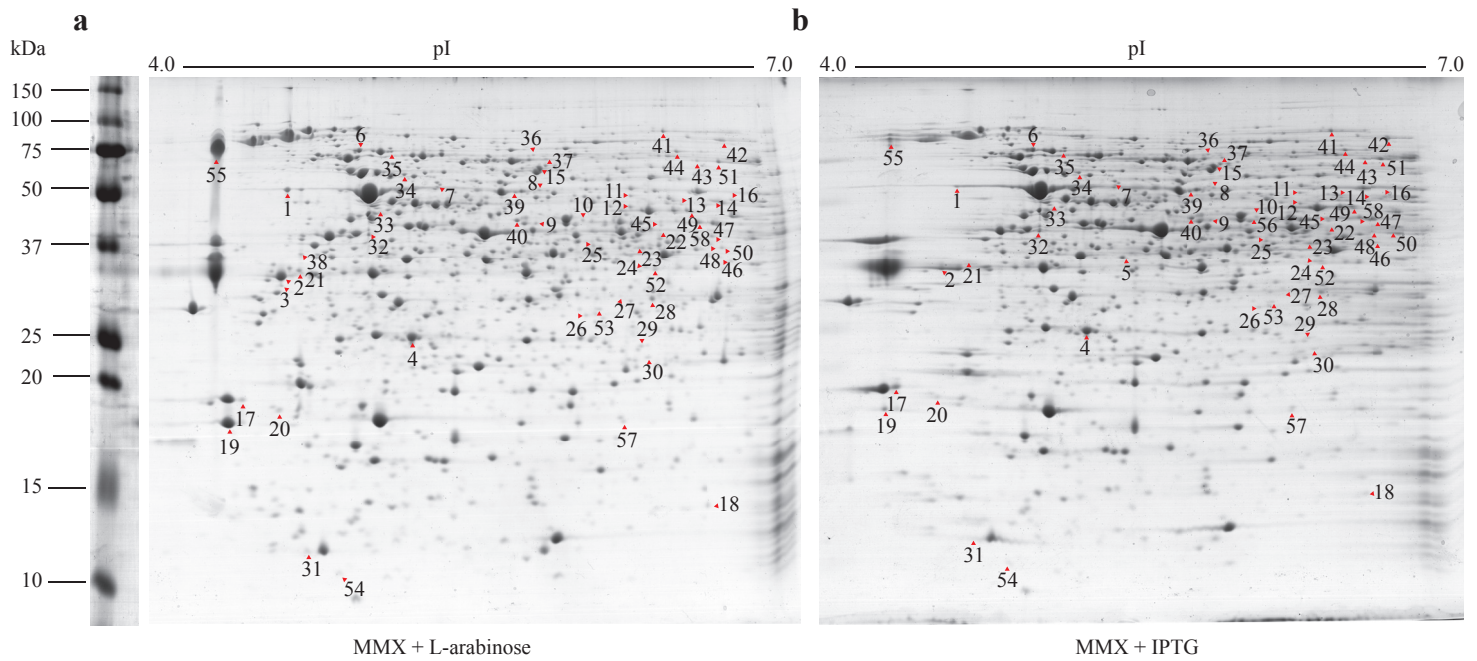

**Figure S6.** Two-dimension electrophoresis (2-DE) identified differently expressed proteins modulated by PhoP<sub>Xcc</sub>. 2-DE analysis of total proteins of the  $\Delta$ phoP-pphoP strain grown under the induced (A) and repressed (B) conditions. Total proteins were extracted from the  $\Delta$ phoP-pphoP strain that was grown in MMX minimal medium with either 0.05% L-arabinose (A) or 2 mM IPTG (B) for 60 min, respectively. Coomassie brilliant blue was used to stain the proteins. The red triangles indicate protein spots identified by MALDI-TOF-MS/MS. Spot IDs are the same as those in Table S3. Each 2-DE analysis was repeated independently three times, with two technical replicates.



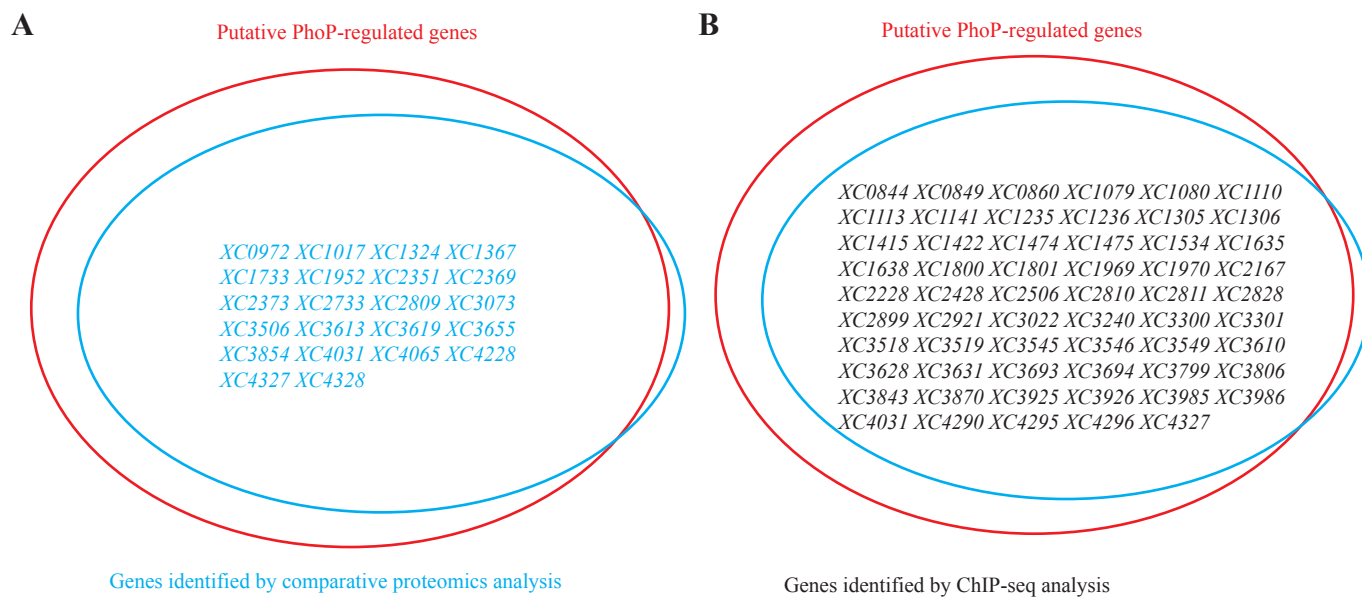

**Figure S7** Venn diagram of PhoP-regulated genes of *X. campestris* pv. *campestris* identified by various approaches. (A) Genes with putative PhoP-binding motif in their promoter region. The listed genes encode differently expressed proteins that were identified by comparative proteomic analysis (Table S3). (B) Genes with putative PhoP-binding motif in their promoter region. The listed genes were identified by ChIP-seq analysis (Table S4). In both (A) and (B), results of proteomic and ChIP-seq analyses were compared to the predicted genes with PhoP-binding motif in their promoter region (Table S5).



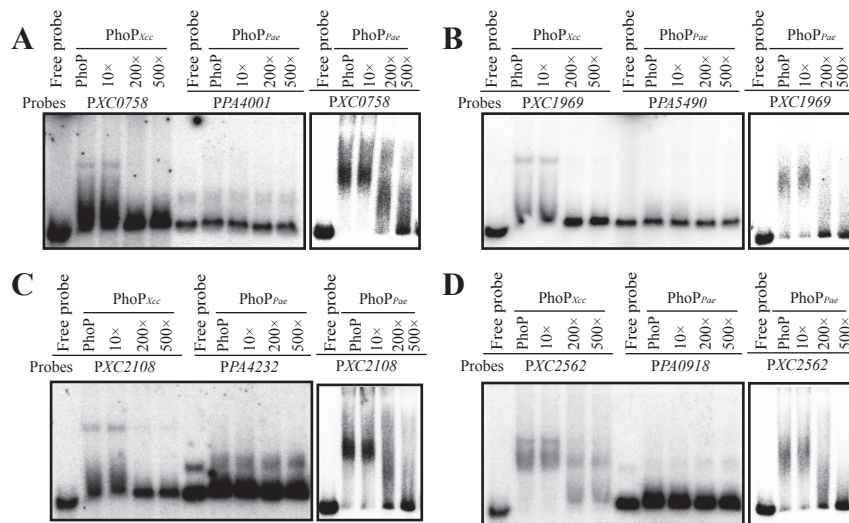

**Figure S8.** PhoP of *X. campestris* pv. *campestris* and *P. aeruginosa* differently control the transcriptions of downstream non-essential genes differently. (A–D) PhoP-promoter binding assay. EMSA analysis revealed that both PhoP<sub>Xcc</sub> and PhoP<sub>Pae</sub> bind directly to the promoter regions of four essential genes (*XC0758*, *XC1969*, *XC2108*, and *XC2562*) of *X. campestris* pv. *campestris*, but PhoP<sub>Pae</sub> did not bind the promoter regions of their orthologues in *P. aeruginosa* (*PA4001*, *PA5490*, *PA4232*, and *PA0918*). The DNA probes were labelled with [ $\gamma$ -<sup>32</sup>P]ATP. Increasing amounts of unlabelled probes were used as competitors. The experiments were repeated three times, and a representative is shown.

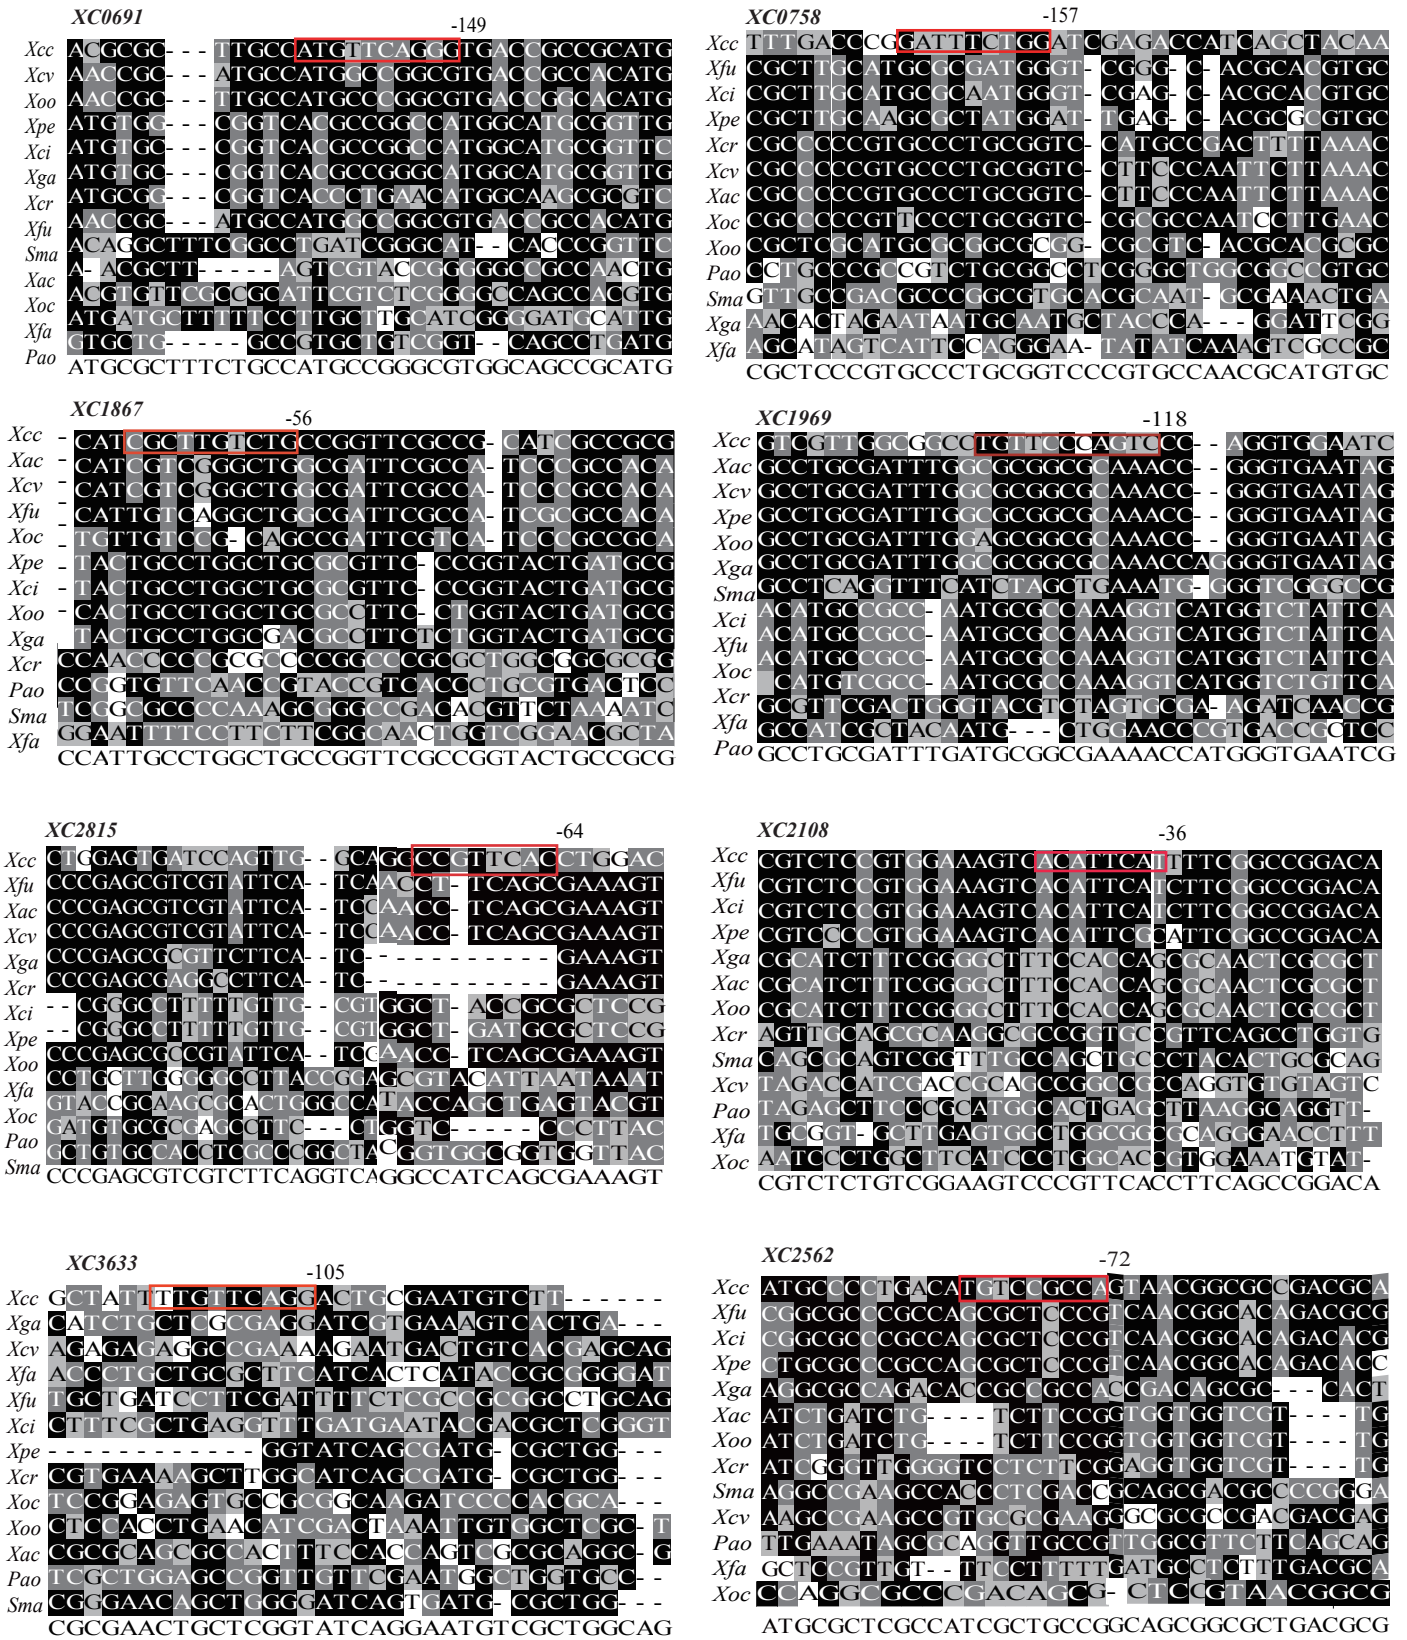

**Figure S9** Genetic polymorphism of the promoter regions of PhoP-regulated genes in *Xanthomonas* spp. and close-relatives. Sequences were aligned by Clustal X. The PhoP-binding motif is indicated by red frame. *Xcc*, *Xanthomonas campestris* pv. *campestris* 8004. *Pao*, *Pseudomonas aeruginosa* PAO1. *Xfu*, *Xanthomonas fuscans* subsp. *aurantifolii* FDC 1609. *Xcr*, *Xanthomonas campestris raphani* 756C. *Xoc*, *Xanthomonas oryzae oryzicola* BLS256. *Xac*, *Xanthomonas axonopodis* pv. *citrumelo* F1. *Xcv*, *Xanthomonas campestris vesicatoria* 85-10. *Xpe*, *Xanthomonas perforans* 91-118. *Xci*, *Xanthomonas citri* subsp. *citri* LH201. *Xga*, *Xanthomonas gardneri* strain JS749-3. *Xoo*, *Xanthomonas oryzae* pv. *oryzae* PAO99A. *Sma*, *Stenotrophomonas maltophilia* K279a. *Xfa*, *Xylella fastidiosa* M12

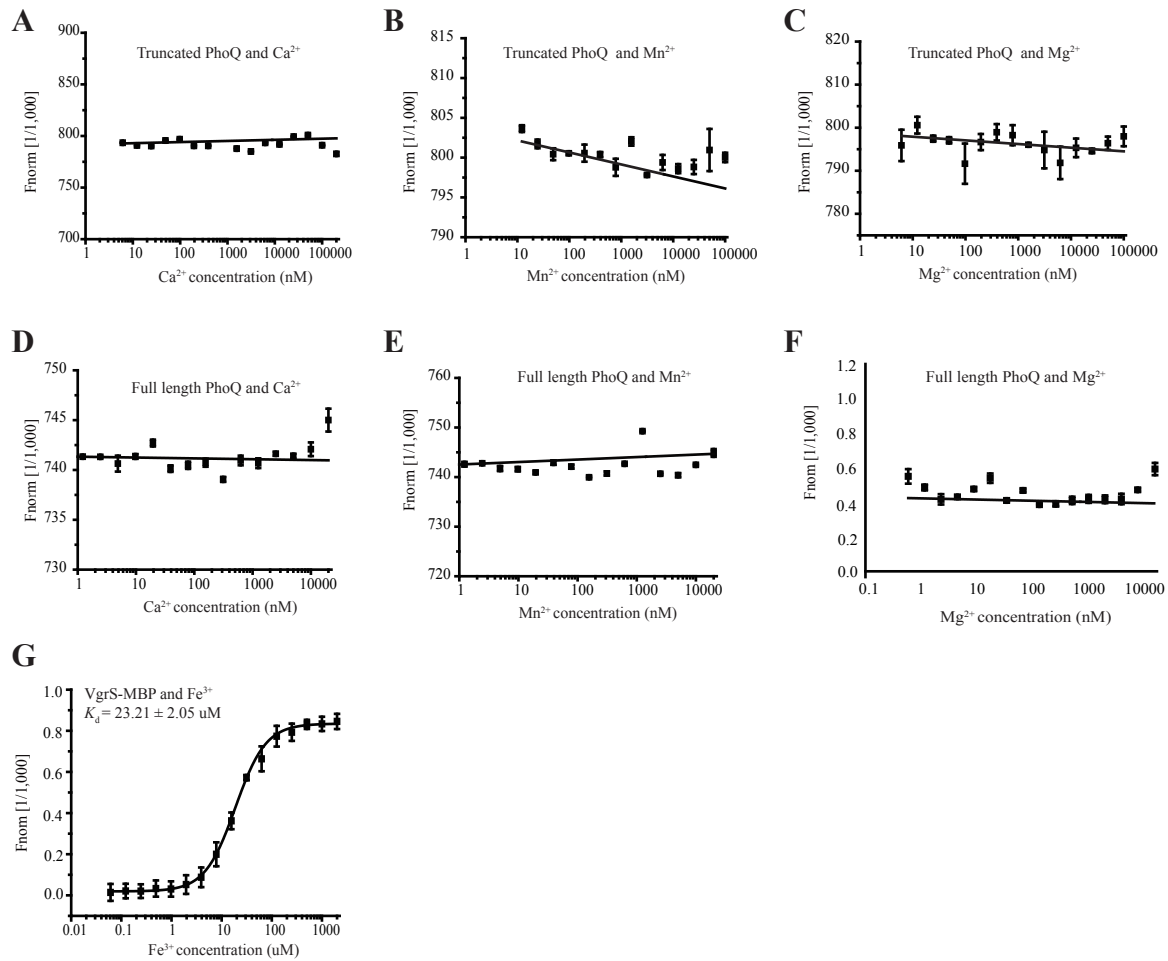

**Figure S10.** PhoQ<sub>Xcc</sub> of *X. campestris* pv. *campestris* did not bind to metal ions. Microscale thermophoresis was used to measure the binding affinity between metal ions and PhoQ<sub>Xcc</sub>. (A-C) Truncated, soluble PhoQ<sub>Xcc</sub> did not bind to Ca<sup>2+</sup>, Mn<sup>2+</sup> or Mg<sup>2+</sup>. Truncated PhoQ<sub>Xcc</sub> containing the cytoplasmic region was used in the analysis. (D-E) Full-length PhoQ<sub>Xcc</sub> embedded in the inverted membrane vesicle did not bind to Ca<sup>2+</sup>, Mn<sup>2+</sup> or Mg<sup>2+</sup>. (G) Full-length histidine kinase VgrS<sub>Xcc</sub> embedded in the inverted membrane vesicle binds to Fe<sup>3+</sup>, which is used as a positive control. The concentrations of metal ions were gradually increased from 0.01 μM to 1.0 mM.  $K_d$  = dissociation constant. The assay was repeated independently three times.

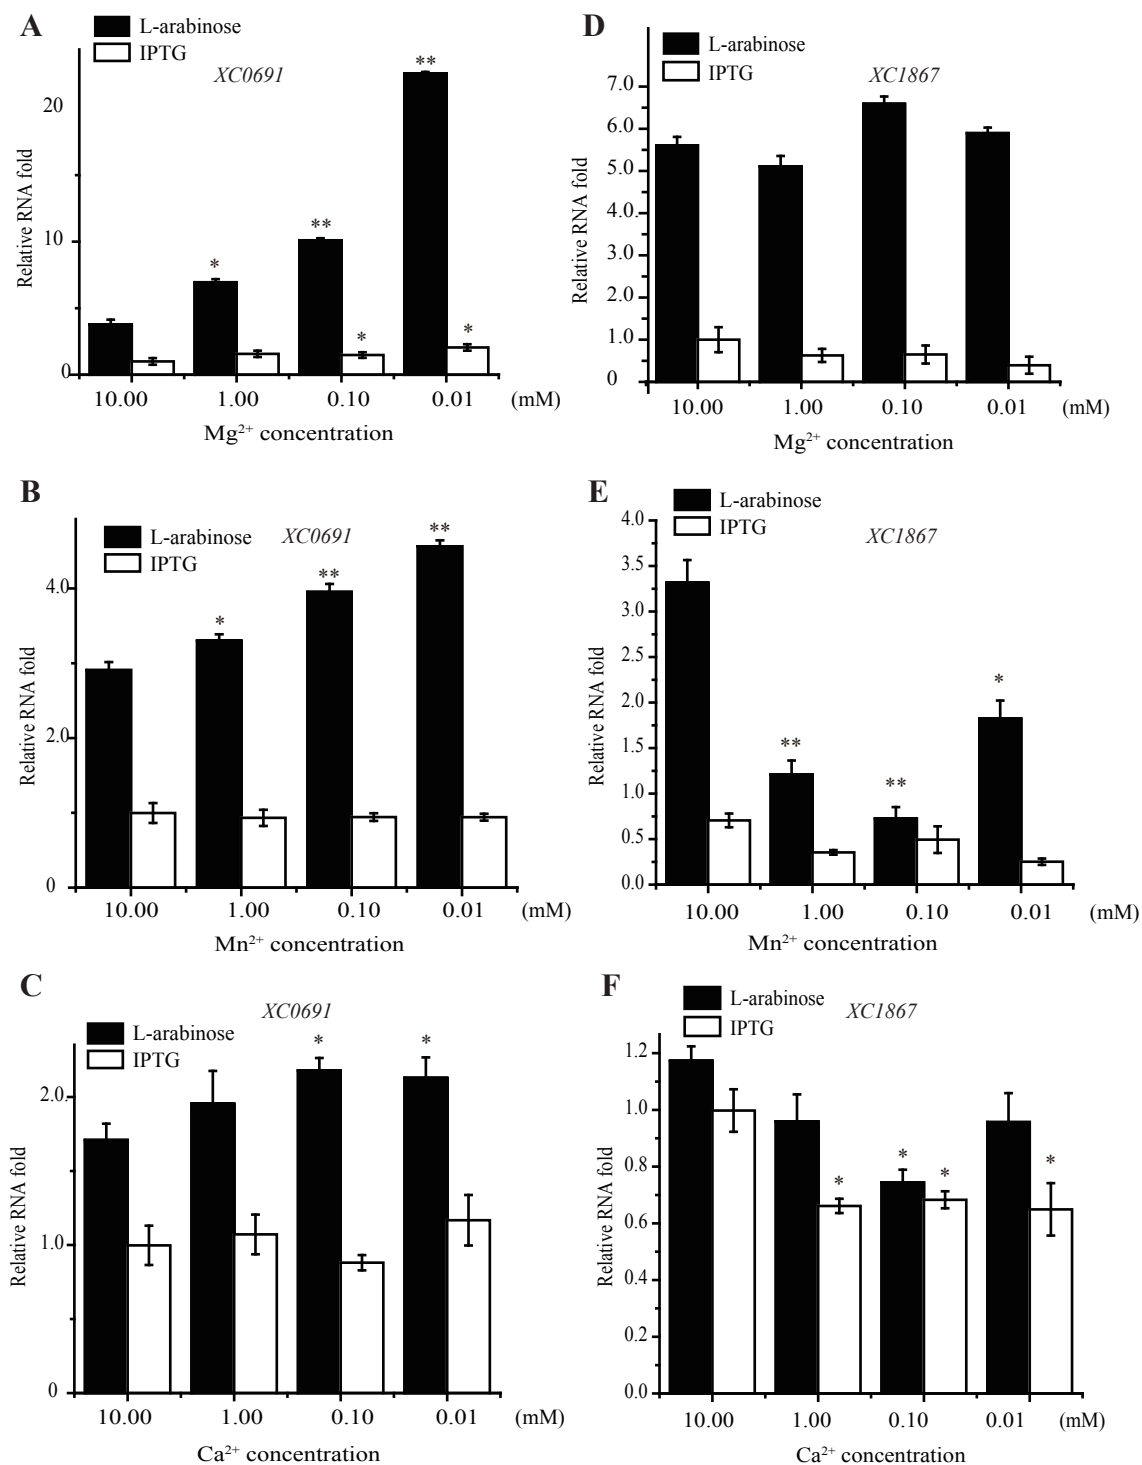

**Figure S11** Transcription levels of PhoP regulated genes under various metal stimulation. (A-C) mRNA levels of *XC0691*; (D-F) mRNA levels of *XC1867*. qRT-PCR was used to quantify the amount of mRNA in the *phoP* mutant of *X. campestris* pv. *campestris*. L-arabinose and IPTG were used to activate or repress the transcription of *phoP* gene. Different concentrations of  $Mg^{2+}$  ( $MgSO_4$ ),  $Mn^{2+}$  ( $MnCl_2$ ) and  $Ca^{2+}$  ( $CaCl_2$ ) were used to treat bacteria before extraction of total RNA. Amplification of the cDNA of tmRNA was used as internal control. The experiment was repeated biologically for three times, and the result of a representative one was shown. \* indicates significant difference compared with the samples treated by 10 mM metal.

**Table S1.** Bacterial strains and plasmids used in this study.

| Strain or plasmid                                     | Genotype or description <sup>a</sup>                                                                                                                                                                                                                                                         | Reference or source   |
|-------------------------------------------------------|----------------------------------------------------------------------------------------------------------------------------------------------------------------------------------------------------------------------------------------------------------------------------------------------|-----------------------|
| <b>Strains</b>                                        |                                                                                                                                                                                                                                                                                              |                       |
| <i>X. campestris</i> pv. <i>campestris</i> 8004       | Wild-type strain (WT), Rif <sup>r</sup>                                                                                                                                                                                                                                                      | Laboratory collection |
| <i>Pseudomonas aeruginosa</i> PAO1                    | Wild-type strain, Cb <sup>r</sup>                                                                                                                                                                                                                                                            | Laboratory collection |
| <i>X. oryzae</i> pv. <i>oryzae</i> PXO99 <sup>A</sup> | Wild-type strain                                                                                                                                                                                                                                                                             | Laboratory collection |
| <i>E. coli</i> DH5 $\alpha$                           | Bacterial host for gene cloning                                                                                                                                                                                                                                                              | Laboratory collection |
| <i>E. coli</i> BL21(DE3) M0050                        | Bacterial host for protein expression<br>WT-pHM2, wild-type of <i>X. campestris</i> pv. <i>campestris</i> 8004 containing a blank pHM2 plasmid, Rif <sup>r</sup> , Sp <sup>r</sup>                                                                                                           | Novagen<br>This study |
| M0051                                                 | WT-pphoP, wild-type of <i>X. campestris</i> pv. <i>campestris</i> 8004 containing a pBAD- <i>araC-phoP<sub>Xcc</sub></i> insert supplemented by pHM2 vector, Rif <sup>r</sup> , Sp <sup>r</sup>                                                                                              | This study            |
| M0052                                                 | WT-pphoQ, wild-type of <i>X. campestris</i> pv. <i>campestris</i> 8004 containing a pBAD- <i>araC-phoQ<sub>Xcc</sub></i> insert supplemented by pHM2 vector, Rif <sup>r</sup> , Sp <sup>r</sup>                                                                                              | This study            |
| M0053                                                 | $\Delta$ phoP-pphoP, chromosomal <i>phoP<sub>Xcc</sub></i> in-frame deletion mutant of <i>X. campestris</i> pv. <i>campestris</i> 8004, containing a vector-borne pBAD- <i>araC-phoP<sub>Xcc</sub></i> , Rif <sup>r</sup> , Sp <sup>r</sup>                                                  | This study            |
| M0054                                                 | $\Delta$ phoQ-pphoQ, chromosomal <i>phoQ<sub>Xcc</sub></i> in-frame deletion mutant of <i>X. campestris</i> pv. <i>campestris</i> 8004, containing a vector-borne pBAD- <i>araC-phoQ<sub>Xcc</sub></i> , Rif <sup>r</sup> , Sp <sup>r</sup>                                                  | This study            |
| M0055                                                 | $\Delta$ phoP*-GFP, $\Delta$ phoP* strain of <i>X. campestris</i> pv. <i>campestris</i> 8004 containing a chromosomal <i>PnptIII</i> -GFP fusion that was inserted into the genomic region between <i>XC_1972</i> and <i>XC_1973</i> , Rif <sup>r</sup> , Sp <sup>r</sup> , Kan <sup>r</sup> | This study            |
| M0056                                                 | $\Delta$ phoQ*-GFP, $\Delta$ phoP* strain of <i>X. campestris</i> pv. <i>campestris</i> 8004 containing a chromosomal <i>PnptIII</i> -GFP fusion that was inserted into the genomic region between <i>XC_1972</i> and <i>XC_1973</i> , Rif <sup>r</sup> , Sp <sup>r</sup> , Kan <sup>r</sup> | This study            |
| M0057                                                 | $\Delta$ phoQ*-phoP-his <sub>6</sub> , $\Delta$ phoQ* strain of <i>X. campestris</i> pv. <i>campestris</i> 8004 containing a His <sub>6</sub> coding sequence-tagged <i>phoP<sub>Xcc</sub></i> , Rif <sup>r</sup> , Sp <sup>r</sup> . For chromatin-immunoprecipitation.                     | This study            |
| M0058                                                 | $\Delta$ phoP <sub>Pae</sub> , Markerless deletion mutant of <i>phoP<sub>Pae</sub></i> of <i>P. aeruginosa</i> , Cb <sup>r</sup>                                                                                                                                                             | This study            |
| M0060                                                 | $\Delta$ phoP <sub>Pae</sub> -phoP <sub>Pae</sub> , genetic complementary strain of M0058                                                                                                                                                                                                    | This study            |
| M0061                                                 | $\Delta$ phoQ <sub>Pae</sub> , Markerless deletion mutant of <i>phoQ<sub>Pae</sub></i> of <i>P. aeruginosa</i> , Cb <sup>r</sup>                                                                                                                                                             | This study            |
| M0062                                                 | $\Delta$ phoQ <sub>Pae</sub> -phoQ <sub>Pae</sub> , genetic complementary strain of M0061                                                                                                                                                                                                    | This study            |
| M0063                                                 | $\Delta$ phoP*-phoP <sub>Pae</sub> , chromosomal <i>phoP<sub>Xcc</sub></i> in-frame deletion mutant, containing a vector-borne pHM1- <i>phoP<sub>Pae</sub></i> of <i>P. aeruginosa</i> , Rif <sup>r</sup> , Sp <sup>r</sup>                                                                  | This study            |

|                      |                                                                                                                                                                                                                                                                     |                       |
|----------------------|---------------------------------------------------------------------------------------------------------------------------------------------------------------------------------------------------------------------------------------------------------------------|-----------------------|
| M0064                | $\Delta$ phoQ*-phoP <sub>Pae</sub> , chromosomal <i>phoQ</i> <sub>Xcc</sub> in-frame deletion mutant, containing a vector-borne pHM1- <i>phoQ</i> <sub>Pae</sub> of <i>P. aeruginosa</i> , Rif <sup>r</sup> , Sp <sup>r</sup>                                       | This study            |
| M0065                | $\Delta$ phoQ*-phoQ <sub>Xoo</sub> , chromosomal <i>phoQ</i> <sub>Xcc</sub> in-frame deletion mutant, containing a vector-borne pBAD- <i>araC-phoQ</i> <sub>Xoo</sub> of <i>X. oryzae</i> pv. <i>oryzae</i> PXO99 <sup>A</sup> , Rif <sup>r</sup> , Sp <sup>r</sup> | This study            |
| M0066                | $\Delta$ phoP* <sub>Xoo</sub> , chromosomal <i>phoP</i> <sub>Xoo</sub> in-frame deletion mutant, containing a vector-borne pBAD- <i>araC-phoP</i> <sub>Xoo</sub> , Rif <sup>r</sup> , Sp <sup>r</sup>                                                               | This study            |
| M0067                | $\Delta$ phoQ* <sub>Xoo</sub> , chromosomal <i>phoQ</i> <sub>Xoo</sub> in-frame deletion mutant <i>X. oryzae</i> pv. <i>oryzae</i> PXO99 <sup>A</sup> , containing a vector-borne pBAD- <i>araC-phoQ</i> <sub>Xoo</sub> , Rif <sup>r</sup> , Sp <sup>r</sup>        | This study            |
| M0068                | $\Delta$ XC0691*, in-frame deletion mutant of essential gene <i>XC0691</i> , which contains a pHM1:: <i>XC0691</i> as a prerequisite to delete the chromosomal copy. Rif <sup>r</sup> , Sp <sup>r</sup>                                                             | This study            |
| M0069                | $\Delta$ XC1867*, in-frame deletion mutant of essential gene <i>XC1867</i> , which contains a pHM1:: <i>XC1867</i> as a prerequisite to delete the chromosomal copy. Rif <sup>r</sup> , Sp <sup>r</sup>                                                             | This study            |
| M0070                | $\Delta$ XC2815*, in-frame deletion mutant of essential gene <i>XC2815</i> , which contains a pHM1:: <i>XC2815</i> as a prerequisite to delete the chromosomal copy. Rif <sup>r</sup> , Sp <sup>r</sup>                                                             | This study            |
| M0071                | $\Delta$ XC3633*, in-frame deletion mutant of essential gene <i>XC3633</i> , which contains a pHM1:: <i>XC3633</i> as a prerequisite to delete the chromosomal copy. Rif <sup>r</sup> , Sp <sup>r</sup>                                                             | This study            |
| M0072                | $\Delta$ XC0758, insertional mutant of non-essential gene <i>XC0758</i> , Kan <sup>r</sup> , Sp <sup>r</sup>                                                                                                                                                        | This study            |
| M0073                | $\Delta$ XC1969, insertional mutant of non-essential gene <i>XC1969</i> , Kan <sup>r</sup> , Sp <sup>r</sup>                                                                                                                                                        | This study            |
| M0074                | $\Delta$ XC2108, insertional mutant of non-essential gene <i>XC2108</i> , Kan <sup>r</sup> , Sp <sup>r</sup>                                                                                                                                                        | This study            |
| M0075                | $\Delta$ XC2562, insertional mutant of non-essential gene <i>XC2562</i> , Kan <sup>r</sup> , Sp <sup>r</sup>                                                                                                                                                        | This study            |
| <b>Plasmids</b>      |                                                                                                                                                                                                                                                                     |                       |
| pGEM-T Easy          | Cloning vector for PCR products, Amp <sup>r</sup> .                                                                                                                                                                                                                 | Promega               |
| pET30a               | Protein expression vector with a T7 promoter, Kan <sup>r</sup> .                                                                                                                                                                                                    | Novagen               |
| pK18mobsacB          | <i>sacB</i> marker containing mobilizable suicide vector, Kan <sup>r</sup> . For gene in-frame deletion.                                                                                                                                                            | Schäfer et al. (1994) |
| pEX18Gm              | <i>sacB</i> marker-containing mobilizable suicide vector, Gm <sup>r</sup> . For in-frame deletion of genes in <i>P. aeruginosa</i> PAO1.                                                                                                                            | Hoang et al., (1998)  |
| pHM1                 | <i>lacZ</i> promoter driving broad-host-range plasmid, Sp <sup>r</sup> . For gene complementation.                                                                                                                                                                  | Laboratory collection |
| pHM2                 | Promoterless broad-host-range plasmid, Sp <sup>r</sup> .                                                                                                                                                                                                            | Laboratory collection |
| pphoP <sub>Xcc</sub> | pHM2::pBAD- <i>araC-phoP</i> <sub>Xcc</sub> , Sp <sup>r</sup> .                                                                                                                                                                                                     | This study            |
| pphoQ <sub>Xcc</sub> | pHM2::pBAD- <i>araC-phoQ</i> <sub>Xcc</sub> , Sp <sup>r</sup> .                                                                                                                                                                                                     | This study            |

|                         |                                                                                                                                                                           |            |
|-------------------------|---------------------------------------------------------------------------------------------------------------------------------------------------------------------------|------------|
| pK-phoP <sub>Xcc</sub>  | pK18mobsacB derivate which contains part of <i>phoP<sub>Xcc</sub></i> gene. For constructing in-frame deletion mutant of <i>phoP<sub>Xcc</sub></i> gene, Kan <sup>r</sup> | This study |
| pK-phoQ <sub>Xcc</sub>  | pK18mobsacB derivate which contains part of <i>phoQ<sub>Xcc</sub></i> gene. For constructing in-frame deletion mutant of <i>phoQ<sub>Xcc</sub></i> gene, Kan <sup>r</sup> | This study |
| pK-phoP <sub>Xoo</sub>  | pK18mobsacB derivate which contains part of <i>phoP<sub>Xoo</sub></i> gene. For constructing in-frame deletion mutant of <i>phoP<sub>Xoo</sub></i> gene, Kan <sup>r</sup> | This study |
| pK-phoQ <sub>Xoo</sub>  | pK18mobsacB derivate which contains part of <i>phoQ<sub>Xoo</sub></i> gene. For constructing in-frame deletion mutant of <i>phoQ<sub>Xoo</sub></i> gene, Kan <sup>r</sup> | This study |
| Gm-phoP <sub>Pae</sub>  | pEX18Gm derivate which contains part of <i>phoP<sub>Pae</sub></i> gene. For constructing in-frame deletion mutant of <i>phoP<sub>Pae</sub></i> gene, Gm <sup>r</sup>      | This study |
| Gm-phoQ <sub>Pae</sub>  | pEX18Gm derivate which contains part of <i>phoQ<sub>Pae</sub></i> gene. For constructing in-frame deletion mutant of <i>phoQ<sub>Pae</sub></i> gene, Gm <sup>r</sup>      | This study |
| pK-XC0691               | pK18mobsacB derivate which contains part of <i>XC0691</i> gene. For constructing in-frame deletion mutant of <i>XC0691</i> , Kan <sup>r</sup>                             | This study |
| pK-XC1867               | pK18mobsacB derivate which contains part of <i>XC1867</i> gene. For constructing in-frame deletion mutant of <i>XC1867</i> , Kan <sup>r</sup>                             | This study |
| pK-XC2815               | pK18mobsacB derivate which contains part of <i>XC2815</i> gene. For constructing in-frame deletion mutant of <i>XC2815</i> , Kan <sup>r</sup>                             | This study |
| pK-XC3633               | pK18mobsacB derivate which contains part of <i>XC3633</i> gene. For constructing in-frame deletion mutant of <i>XC3633</i> , Kan <sup>r</sup>                             | This study |
| ii-XC0758               | pK18mobsacB derivate which contains part of <i>XC0758</i> gene. For constructing insert inactivation mutant of <i>XC0758</i> gene, Kan <sup>r</sup>                       | This study |
| ii-XC1969               | pk18mobsacB derivate which contains part of <i>XC1969</i> gene. For constructing insert inactivation mutant of <i>XC1969</i> , Kan <sup>r</sup>                           | This study |
| ii-XC2108               | pK18mobsacB derivate which contains part of <i>XC2108</i> gene. For constructing insert inactivation mutant of <i>XC2108</i> , Kan <sup>r</sup>                           | This study |
| ii-XC2562               | pK18mobsacB derivate which contains part of <i>XC2562</i> gene. For constructing insert inactivation mutant of <i>XC2562</i> , Kan <sup>r</sup>                           | This study |
| pET-phoP <sub>Xcc</sub> | pET30a:: <i>phoP<sub>Xcc</sub></i> , for expression of full-length PhoP <sub>Xcc</sub> , Kan <sup>r</sup>                                                                 | This study |
| pET-phoQ <sub>Xcc</sub> | pET30a:: <i>phoQ<sub>Xcc</sub></i> , for expression of full-length PhoQ <sub>Xcc</sub> , Kan <sup>r</sup>                                                                 | This study |
| pET-phoP <sub>Xoo</sub> | pET30a:: <i>PXO_02836</i> , for expression of full-length PhoP <sub>Xoo</sub> . Kan <sup>r</sup>                                                                          | This study |
| pET-phoQ <sub>Xoo</sub> | pET30a:: <i>PXO_02837</i> , for expression of full-length PhoP <sub>Xoo</sub> . Kan <sup>r</sup>                                                                          | This study |
| pET-phoP <sub>Pae</sub> | pET30a::PA1179, for expression of full-length PhoP <sub>Pae</sub> , Kan <sup>r</sup>                                                                                      | This study |
| pET-phoQ <sub>Pae</sub> | pET30a::PA1180, for expression of full-length PhoQ <sub>Pae</sub> , Kan <sup>r</sup>                                                                                      | This study |
| pHM-XC0691              | pHM1:: <i>XC0691</i> , Sp <sup>r</sup> .                                                                                                                                  | This study |
| pHM-XC1867              | pHM1:: <i>XC1867</i> , Sp <sup>r</sup> .                                                                                                                                  | This study |
| pHM-XC2815              | pHM1:: <i>XC2815</i> , Sp <sup>r</sup> .                                                                                                                                  | This study |
| pHM-XC3633              | pHM1:: <i>XC3633</i> , Sp <sup>r</sup> .                                                                                                                                  | This study |

<sup>a</sup> Antibiotic resistance: Rif<sup>r</sup>, Kan<sup>r</sup>, Amp<sup>r</sup>, Gm<sup>r</sup>, Cb<sup>r</sup> and Sp<sup>r</sup>, represent resistant to rifampicin, kanamycin, ampicillin, gentamicin, carbenicillin and spectinomycin, respectively.



**Table S2.** Primers used in this study.

| Primer name    | Sequence (forward/reverse)       | Length & description                                                  |
|----------------|----------------------------------|-----------------------------------------------------------------------|
| P1             | CGGCATGATTCTGTCCGGTGG            | 487 bp;                                                               |
| P2             | TTGCAGTTGCTGCGGTGTCG             | For operon verification                                               |
| P3             | GAGCAAGCCGACCCTGGAAT             | 525 bp;                                                               |
| P4             | GGCGTTGGCGTAGTTCCTCAGC           | For operon verification                                               |
| P5             | TTTGGCGATAGCCGGCTGAC             | 321 bp;                                                               |
| P6             | AACAGCAAAGCCTTCGCGCT             | For operon verification                                               |
| P7             | GGTTGGGAGCTGGTGGAACA             | 413 bp;                                                               |
| P8             | AGACGACGGGACGTGTGGAA             | For operon verification                                               |
| P9             | TGTTGTTCCGCCCTTCGGACG            | 401 bp;                                                               |
| P10            | ATTTCCGTGTACAGCCGCGC             | For operon verification                                               |
| phoQ-F         | GGACGTTCCAAGTGGTATCG             | 224 bp;                                                               |
| phoQ-R         | CCGAGATACAGCGAGCCATC             | as positive control For operon verification                           |
| 4031-up-F      | TCTAGATGTTCCGTTTGGCGATAGC        | 353 bp;                                                               |
| 4031-up-R      | GAATTCCTTCTTCGCCGTCTGTGC         | For $\Delta$ phoP <sub>Xcc</sub> * construction                       |
| 4031-down-F    | GAATTCGTGCTGGAAGTGTTCATCGG       | 444 bp;                                                               |
| 4031-down-R    | CTGCAGCGTCAGGTCGACCACTTC         | For $\Delta$ phoP <sub>Xcc</sub> * construction                       |
| 4030-up-F      | GAATTCGTGCTGGAAGTGTTCATCGG       | 444 bp;                                                               |
| 4030-up-R      | GGATCCGTCAGGTCGACCACTTC          | For $\Delta$ phoQ <sub>Xcc</sub> * construction                       |
| 4030-down-F    | GATCCGCCGGCATGATTCTGTCCGGTGG     | 444 bp;                                                               |
| 4030-down-R    | GTCGACTTGCAGTTGCTGCGGTGTGC       | For $\Delta$ phoQ <sub>Xcc</sub> * construction                       |
| His-PhoP-Xcc-F | CATATGCGTATCCTTTTGGTCTGA         | 681 bp;                                                               |
| His-PhoP-Xcc-R | CTCGAGGCCTTCCGTACGCGGGA          | For PhoP <sub>Xcc</sub> protein expression                            |
| His-PhoQ-Xcc-F | CATATGGTGTCTGGGACGTTCCAAGTGG     | 1413 bp;                                                              |
| His-PhoQ-Xcc-R | CTCGAGCAAGCCTGGCGGCAGGGTGA       | For PhoQ <sub>Xcc</sub> protein expression                            |
| phoP-F         | GTCGACCATATGCGTATCCTTTTGGTCTGA   | 684 bp;                                                               |
| phoP-R         | GGTACCCTCGAGGCCTTCCGTACGCGGGA    | For pphoP <sub>Xcc</sub> plasmid construction                         |
| phoQ-F         | GCGTGCACATGTCTGGGACGTTCCAAGTGG   | 1416 bp;                                                              |
| phoQ-R         | CGGGGTACCTTACAAGCCTGGCGGCAGGGTGA | For pphoQ <sub>Xcc</sub> plasmid construction                         |
| XC4030-F       | GGATCCGGCGAGATCCCGTACACCATT      | 801 bp;                                                               |
| XC4030-R       | AAGCTTACGCACACCGCGCTGCAGGA       | For <i>phoQ</i> <sub>Xcc</sub> insertion inactive mutant construction |
| XC4031-F       | AGGTCTCTACATGGGCCGTGAA           | 524 bp;                                                               |
| XC4031-R       | TCGGCTTCAACTACCATCCGGGTCAAG      | For <i>phoP</i> <sub>Xcc</sub> insertion inactive mutant construction |
| pBAD-F         | GAATTCACTCCAGAAAGGCCACCAAC       | 1371 bp;                                                              |
| pBAD-R         | GTCGACCCCAAAAAACGGGTATGGA        | For pBAD- <i>araC</i> promoter fragment PCR                           |
| p-F            | ATTGGTGTGACACGGTGCCG             | 1577 bp;                                                              |
| p-R            | ATGCGGCCATGCGGAATGCT             | For $\Delta$ phoP <sub>Xcc</sub> mutant PCR verification              |

|             |                                                    |                                                                                  |
|-------------|----------------------------------------------------|----------------------------------------------------------------------------------|
| q-F         | GAGCAAGCCGACCCTGGAAT                               | 2135 bp;                                                                         |
| q-R         | GGCAACGCTGCATCGTCGCT                               | For $\Delta$ phoQ <sub>Xcc</sub> mutant PCR verification                         |
| c-F         | AACGCGGCCGCGTGCATATC                               | 200 bp; For EMSA probe                                                           |
| c-R         | GCACTCTCCCTACTTACGTT                               |                                                                                  |
| q-phoP-F    | GCCAATGTGGATCTGACCAG                               | 120 bp; For qRT-PCR                                                              |
| q-phoP-R    | GCGGTCGAAATCCTGCTGAT                               |                                                                                  |
| q-phoQ-F    | GGCATGTGATCGTGCAGGA                                | 100 bp; For qRT-PCR                                                              |
| q-phoQ-R    | GCAGGGTGACTTCGAAGCGT                               |                                                                                  |
| tmRNA-F     | GGGGGTGCACTGGTTTCG                                 | 113 bp; For qRT-PCR internal reference                                           |
| tmRNA-R     | CCGTAGTTGTCGTCGTTGGC                               |                                                                                  |
| 4031-up -F  | TCTAGATGTTCCGTTTGGCGATAGC                          | 931 bp;                                                                          |
| P2-6his-R   | TCAGTGGTGGTGGTGGTGGTGGCCTTCCGTA<br>CGCGGGAT        | For <i>phoP</i> <sub>Xcc</sub> -His <sub>6</sub> epitope construction            |
| P3-6his-F   | CACCACCACCACCACCCTGAGTCAGCACA<br>GCGGCG            | 344 bp;<br>For <i>phoP</i> <sub>Xcc</sub> -His <sub>6</sub> epitope construction |
| 4031-down-R | CTGCAGCGTCAGGTCGACCACTTC                           | 314 bp;                                                                          |
| ftsA-F      | AAATTTTCGAGATGGTGCAG                               | For <i>ftsA</i> <sub>Xcc</sub> qRT-PCR assay                                     |
| ftsA-R      | GCGATACCAGTTCTTCAATT                               | 200 bp;                                                                          |
| ftsA-Xccp-F | GGAATTCACAACGTCCGATCGCGCGCG                        | For <i>Xcc-ftsA</i> promoter fragment PCR                                        |
| ftsA-Xccp-R | CGCGGATCCAGCCGGAATAGCGAATGGG                       |                                                                                  |
| ftsA-Xoop-F | GAATTCAGCTGGCCGATCCGCAGCG                          | 200 bp;                                                                          |
| ftsA-Xoop-R | GGATCCTTAAAGCCGGGAGTCGGGAG                         | For <i>Xoo-ftsA</i> promoter fragment PCR                                        |
| PftsA-F     | GGATCCTGCGCGCGCACGCCTGCAGC                         | 300 bp;                                                                          |
| PftsA -R    | AAGCTTCAGTCCAACGATGAGGGA                           | For <i>ftsA</i> <sub>Xcc</sub> footprinting assay                                |
| PphoP -F    | GGATCCTTTGGCGATAGCCGGCTGACGC                       | 280 bp;                                                                          |
| PphoP -R    | AAGCTTCGCGCAGCGGAGCTTCGT                           | For <i>phoP</i> <sub>Xcc</sub> footprinting assay                                |
| Poar -F     | CACACAGCATTGCTCGAACGA                              | 202 bp;                                                                          |
| Poar -R     | ACGGACACTGCAGACGTGGGAC                             | For <i>oar</i> <sub>Xcc</sub> footprinting assay                                 |
| A28nt-F     | CGCACGCGCTGGTCCTTAATTCTCTGCG                       | 28 bp; as <i>ftsA</i> -Wt                                                        |
| A28nt-R     | CGCAGAGAATTAAGGACCAGCGCGTGCG                       | For motif EMSA and MST test                                                      |
| P28nt-F     | ACTTCTGCGTTTCAGTGACATAAATCCCC                      | 28 bp; as <i>phoP</i> <sub>Xcc</sub> -Wt                                         |
| P28nt-R     | GGGGATTTATGTCACTGAACGCAGAAGT                       | For motif MST test                                                               |
| Oar25nt-F:  | CCGTTTCAGGTTGTTTCAGGCGATCCC                        | 25 bp; as <i>Oar</i> <sub>Xcc</sub> -Wt2                                         |
| Oar25nt-R:  | GGGATCGCCTGAACAACCTGAACGG                          | For motif MST test                                                               |
| 7273-up-F   | GAGCTCGGTACCCGGGGAT<br>CCACCAAAGACGGCTGACG<br>GTTG | 319 bp; For <i>ftsZ</i> <sub>Xcc</sub> -eGFP construction                        |
| 7273-up-R   | CTGAGCTGTTACAGCCTGACCCGTCCTGACT<br>GTCCTCAAGAT     |                                                                                  |
| Npt-rbs-F   | GTCAGGCTGTAACAGCTCAGA                              | 386 bp; For <i>ftsZ</i> <sub>Xcc</sub> -eGFP construction                        |
| Npt-rbs-R   | AGTTCAAATGTGCCATATGTTTTTCCTCCTT                    |                                                                                  |

|                |                                                      |                                                    |
|----------------|------------------------------------------------------|----------------------------------------------------|
|                | CTGCAGAT                                             |                                                    |
| ftsZ-F         | ATGGCACATTTTGAAGCTGATCGA                             | 1128bp; For ftsZ <sub>Xcc</sub> -eGFP              |
| ftsZ-R         | TCGCCCTTGCTCACCATGTCGGCCTGGCGGC<br>GCAGGAA           | construction                                       |
| Egfp-F         | ATGGTGAGCAAGGGCGAGGAGCT                              | 720 bp; For ftsZ <sub>Xcc</sub> -eGFP              |
| Egfp-R         | CTGCCGTCTTCCCTAACGATCATTACTTGTAC<br>AGCTCGTCCATGCCGA | construction                                       |
| 7273-down-F    | TGATCGTTAGGGAAGACGGCAGGGC                            | 427 bp; For ftsZ <sub>Xcc</sub> -eGFP              |
| 7273-down-R    | GCATGCCTGCAGGTCTACTCTAGAGGCCGGT<br>TGGCTGACGAAAGTTGA | construction                                       |
| PAOP-up-F      | gaattcACAAGCTGGGCTCCCTGGACCT                         | 300 bp                                             |
| PAOP-up-R      | ggatccGTCGATCACCGCCAGGTCGTGGT                        | For <i>phoP</i> <sub>Pae</sub> mutant construction |
| PAOP-down-F    | ggatccGACGAGGAGCGCGACGCCAAC                          | 301 bp                                             |
| PAOP-down-R    | aagcttCCCTTCTCCACCCGCGCCGCCGA                        | For <i>phoP</i> <sub>Pae</sub> mutant construction |
| PAOQ-up-F      | gaattcGCGCAAGCTGGAGGCCTGCGGCGGCT                     | 261 bp                                             |
| PAOQ-up-R      | ggatccGCCCTTCTCCACCCGCGCCGCCGA                       | For <i>phoQ</i> <sub>Pae</sub> mutant construction |
| PAOQ-down-F    | ggatccGGGCCGGGTTACTCGGAGCTGTGGGT                     | 360 bp                                             |
| PAOQ-down-R    | aagcttAGCCCCTGTCGTCGGTTTTGCCACT                      | For <i>phoQ</i> <sub>Pae</sub> mutant construction |
| CPAO1-P-F:     | GTCGACatgaaactgctgtagtgaaga                          | 678 bp                                             |
| CPAO1-P-R:     | GGTACCtaccggcagcgctcggtga                            | For pHM1- <i>phoP</i> <sub>Pae</sub> construction  |
| CPAO1-Q-F:     | GTCGAC gtagccttccctgcatcctg                          | 1347 bp                                            |
| CPAO1-Q-R:     | GGTACCttagactgtagcgaacgtatg                          | For pHM1- <i>phoQ</i> <sub>Pae</sub> construction  |
| PAO1-P-His6-F: | CATATGatgaaactgctgtagtgaaga                          | 678 bp                                             |
| PAO1-P-His6-R: | CTCGAGcggcagcgctcggtgaacagga                         | For <i>PhoP</i> <sub>Pae</sub> protein expression  |
| PAO1-Q-his6-F: | CATATGGtagccttccctgcatcctg                           | 1347 bp                                            |
| PAO1-Q-his6-R: | CTCGAGgactgtagcgaacgtatgcggaag                       | For <i>PhoQ</i> <sub>Pae</sub> protein expression  |
| P-XC0691-F     | AAAGGTTAACGGCTGCGGCC                                 | 200 bp                                             |
| P-XC0691-R     | CGAGGGAGTCGTTCTTGAAG                                 | For EMSA probe                                     |
| P-XC1867-F     | CAATGCCTGCCAGGCCAGCA                                 | 200 bp                                             |
| P-XC1867-R     | CTTGGCGAGGGTAACTGCGC                                 | For EMSA probe                                     |
| P-XC2815-F     | AACCTTGATTGCGCTGTGCT                                 | 200 bp                                             |
| P-XC2815-R     | GAGGTCTCTCCAGGGATTCA                                 | For EMSA probe                                     |
| P-XC3633-F     | GACCCGGAATATGCGCGAGCCATT                             | 200 bp                                             |
| P-XC3633-R     | CGTTGCTACCTCTGAAATAGTCA                              | For EMSA probe                                     |
| P-XC0758-F     | CCTTTCTCTCTCCAGAAGGATTTT                             | 200 bp                                             |
| P-XC0758-R     | GTGCGCCTGTCACGCGCTGCATAGG                            | For EMSA probe                                     |
| P-XC1969-F     | ACGAAACCATGCGCCCGCAGCCG                              | 200 bp                                             |
| P-XC1969-R     | GCCGTGGCAGCCCTGGCAGGTG                               | For EMSA probe                                     |
| P-XC2108-F     | GGTGGACTCAACACCGAATCC                                | 200 bp                                             |
| P-XC2108-R     | AGTTGGACTACCTTCCAGGCGAAT                             | For EMSA probe                                     |
| P-XC2562-F     | GCACATATCCGTGCACGTTTAC                               | 200 bp                                             |
| P-XC2562-R     | GCCCGCGCGGTGGTCGCCGACGG                              | For EMSA probe                                     |
| P-PA4418-F     | GGCGCCATGCGTTATATAAG                                 | 200 bp                                             |
| P-PA4418-R     | GGGAAAGAAACCCTAGGCCGA                                | For EMSA probe                                     |
| P-PA1795-F     | ACATCAACGCCGACTCCCT                                  | 200 bp                                             |

---

|            |                           |                |
|------------|---------------------------|----------------|
| P-PA1795-R | TTCCTCAGCCCTGTCCCA        | For EMSA probe |
| P-PA0973-F | GCCCAATGGCACCATGCTAATCT   | 200 bp         |
| P-PA0973-R | CATGTAACCTCCTAATGAACCCCA  | For EMSA probe |
| P-PA5451-F | CAAGGCATGGCCAGGGTC        | 200 bp         |
| P-PA5451-R | CAGACCACCTGCCGTAC         | For EMSA probe |
| P-PA4001-F | GCCGGTGGCATCACCATGACG     | 200 bp         |
| P-PA4001-R | TCTTGGTCTCAAACCTGGGCGATC  | For EMSA probe |
| P-PA5490-F | ACCATGCCGCCTGGGAGCCGCGG   | 200 bp         |
| P-PA5490-R | CAGCTAATCCAATTACGGCTAAG   | For EMSA probe |
| P-PA4232-F | CCTGCCGCTCGCGCCCGCGCGC    | 200 bp         |
| P-PA4232-R | GACGTTCTCCTAAGGTTACGCATC  | For EMSA probe |
| P-PA0918-F | CCAGGCCATCCGCGACCGCGAG    | 200 bp         |
| P-PA0918-R | CACGGTTCCTTCTTTCGGCTCTCG  | For EMSA probe |
| q-XC0691-F | TTCAAGAACTCCGCGGCATGT     | 89 bp          |
| q-XC0691-R | ATGCCTTGTCCGCGCACGTA      | For qRT-PCR    |
| q-XC1867-F | ATGAGCCTGCGCCTGCACAA      | 119 bp         |
| q-XC1867-R | CCGATATGCGCATAGTTGTAGACCG | For qRT-PCR    |
| q-XC2815-F | GTCACCCGCATCGATGAGGTTG    | 137 bp         |
| q-XC2815-R | ACGTTCTTGTTGCCCTTGCTGC    | For qRT-PCR    |
| q-XC3633-F | GACATGATTCGGTCCGTATGGGC   | 104 bp         |
| q-XC3633-R | ATCCACAAGGCGCCGAGCTT      | For qRT-PCR    |
| q-XC0758-F | GCCGCGCCACATTCCTCAA       | 87 bp          |
| q-XC0758-R | GGCGAAAACAGCGGCGAAAC      | For qRT-PCR    |
| q-XC1969-F | ACGGCGTGACCGGCTACAAGAA    | 99 bp          |
| q-XC1969-R | GGTATTCGGTCAGTGCCTGGGTCA  | For qRT-PCR    |
| q-XC2108-F | TGAAAGTGCAGATCATGAGTTCCGC | 129 bp         |
| q-XC2108-R | TGAACGGCAGTGGGAAATCGC     | For qRT-PCR    |
| q-XC2562-F | ATGCGTGTCTGCACTGGCTGA     | 108 bp         |
| q-XC2562-R | TTCCAGCAACCACTGCCGCA      | For qRT-PCR    |
| q-tmRNA-F  | AGGGGGCAGCTTTCCTCGTTAAT   | 90 bp          |
| q-tmRNA-R  | AATTAAGCGGCGATAGCGAAGTCC  | For qRT-PCR    |
| q-PA4481-F | ATTGCGTGGCATGTTTTCCAGC    | 112 bp         |
| q-PA4481-R | AATGGCGACCACGGACGGTT      | For qRT-PCR    |
| q-PA1795-F | GTGCTGCAGATCTACAACACGCTGA | 92 bp          |
| q-PA1795-R | GTCATGCCGCACACGTACATGC    | For qRT-PCR    |
| q-PA0973-F | GGCAAATTTGCTGCGCTGGCT     | 89 bp          |
| q-PA0973-R | CCATTGGCACCTTCACCGGAAG    | For qRT-PCR    |
| q-PA5451-F | ATGCTTCTTGCTTGTCTCGTTCCT  | 138 bp         |
| q-PA5451-R | GATCATCGACAGCGGATTGAGCA   | For qRT-PCR    |
| q-PA4001-F | AATGCAAGTACTGCGTACATGGGCG | 132 bp         |
| q-PA4001-R | TCGCTGACGAACTCGGCCACTT    | For qRT-PCR    |
| q-PA5490-F | CTTCTCGTGAGTCTGCTGTTGACCC | 146 bp         |
| q-PA5490-R | AGTTTCGGGAAGTTCGGCGC      | For qRT-PCR    |
| q-PA4232-F | ATGGCCCGTGGGGTTAACAAAG    | 106 bp         |
| q-PA4232-R | TGGCGAGGGTGATGTTGGTCAC    | For qRT-PCR    |

---

---

|               |                                 |                                                              |
|---------------|---------------------------------|--------------------------------------------------------------|
| q-PA0918-F    | ATGAGCTGGAAAAACACCGAATCCC       | 117 bp                                                       |
| q-PA0918-R    | GGGGAAATTGCCCTTCAGTTCGATA       | For qRT-PCR                                                  |
| q-PAssrA-F    | GCCAGCTCTCCGCTATCGGTTCTA        | 94 bp                                                        |
| q-PAssrA-R    | ATACAGCTCGCTCCAAGCACCTG         | For qRT-PCR                                                  |
| XC0691-up-F   | gaattcAaaggttaacggctgcggccggc   | 380 bp                                                       |
| XC0691-up-R   | ggatccggcctccgcaccgacggcagccac  | For <i>XC0691</i> mutant construction                        |
| XC0691-down-F | ggatccCtgcgcgacctggaccgctgat    | 230 bp                                                       |
| XC0691-down-R | aagcttgggagcgcacatgaaacggcgcagg | For <i>XC0691</i> mutant construction                        |
| XC1867-up-F   | gaattcGagacctgggctgaacgcagccc   | 310 bp                                                       |
| XC1867-up-R   | ggatccgatgttgctgctgtagcgcagcgc  | For <i>XC1867</i> mutant construction                        |
| XC1867-down-F | ggatccGcggcgaaaaaagccaagatttc   | 220 bp                                                       |
| XC1867-down-R | aagcttgcgggtggcttcgccttacctc    | For <i>XC1867</i> mutant construction                        |
| XC2815-up-F   | gaattcttaagcctggagtgatccagttg   | 250 bp                                                       |
| XC2815-up-R   | ggatccggcccaatccacgcagcggttc    | For <i>XC2815</i> mutant construction                        |
| XC2815-down-F | ggatccGccgcgtgatcatggtcaaccag   | 490 bp                                                       |
| XC2815-down-R | aagcttgatgcggtagatcgaccgatccgc  | For <i>XC2815</i> mutant construction                        |
| XC3633-up-F   | gaattcTctggtcctgttgctggaag      | 480 bp                                                       |
| XC3633-up-R   | ggatccaggcaactttgctgccaggacctc  | For <i>XC3633</i> mutant construction                        |
| XC3633-down-F | ggatccggggacttctttacggcgctgc    | 220 bp                                                       |
| XC3633-down-R | aagcttttcagaccaaacccagctggccgc  | For <i>XC3633</i> mutant construction                        |
| PA4481-up-F   | GAATTCGatgccgcggtgcggcgtcta     | 224 bp                                                       |
| PA4481-up-R   | GGATCCaccaggtcgatcgacagatcgct   | For <i>PA4481</i> mutant construction                        |
| PA4481-down-F | GGATCCGctcggatatacgcgagcgcg     | 450 bp                                                       |
| PA4481-down-R | AAGCTTatcagctcgctacggctgctgaa   | For <i>PA4481</i> mutant construction                        |
| PA1795-up-F   | GAATTCcggctgtcgcgccgagccgctc    | 230 bp                                                       |
| PA1795-up-R   | GGATCCgccgaccagcggcgtgaagac     | For <i>PA1795</i> mutant construction                        |
| PA1795-down-F | GGATCCCtgcaggcggcgccgagggca     | 480 bp                                                       |
| PA1795-down-R | AAGCTTgtggtgctgctgccggcaa       | For <i>PA1795</i> mutant construction                        |
| PA0973-up-F   | GAATTCtctacccaccgccagcaggac     | 240 bp                                                       |
| PA0973-up-R   | GGATCCcacagccacagccatggcca      | For <i>PA0973</i> mutant construction                        |
| PA0973-down-F | GGATCCGaaggccacaccgacgaacg      | 500 bp                                                       |
| PA0973-down-R | AAGCTTttgagctgctggatctggtt      | For <i>PA0973</i> mutant construction                        |
| PA5451-up-F   | GAATTCcaatggcagtgccgcgcggct     | 390 bp                                                       |
| PA5451-up-R   | GGATCCgtaggccaggccctcgtcga      | For <i>PA5451</i> mutant construction                        |
| PA5451-down-F | GGATCCctcaaccgatgaccgcgct       | 270 bp                                                       |
| PA5451-down-R | AAGCTTggcgcggagggtgaaaggca      | For <i>PA5451</i> mutant construction                        |
| in-XC0691-F   | gaattcAACTCCGCGCATGTTCT         | 304 bp                                                       |
| in-XC0691-R   | aagcttAGGAAGCGCGACTTGTGCAC      | For insert inactivation mutant construction of <i>XC0691</i> |
| in-XC1867-F   | gaattcATGAGCCTGCGCCTGCACAA      | 346 bp                                                       |
| in-XC1867-R   | aagcttTTGCCTCCGGCTCGATATCC      | For insert inactivation mutant construction of <i>XC1867</i> |
| in-XC2815-F   | gaattcATGAAGACCCGACTGCTC        | 347 bp                                                       |
| in-XC2815-R   | aagcttTTGTTCTGGATCGCGTTG        | For insert inactivation mutant construction of <i>XC2815</i> |

---

|             |                                |                                                              |  |
|-------------|--------------------------------|--------------------------------------------------------------|--|
| in-XC3633-F | gaattcGACATGATTCGGTCCGTA       | 316 bp                                                       |  |
| in-XC3633-R | aagcttGTGGAAACGCCTGCTTTT       | For insert inactivation mutant construction of <i>XC3633</i> |  |
| in-XC0758-F | gaattcGCCGCGCCACATTCCTCAA      | 311 bp                                                       |  |
| in-XC0758-R | aagcttTACCGCTGCAGAAAGCCCTG     | For insert inactivation mutant construction of <i>XC0758</i> |  |
| in-XC1969-F | gaattcCGCTTGTCTCGCTCTGGTCGTCTT | 311 bp                                                       |  |
| in-XC1969-R | aagcttTTTGCGCCTGTGCCTGCATG     | For insert inactivation mutant construction of <i>XC1969</i> |  |
| in-XC2108-F | gaattcATGAAAGTGCAGATCATGA      | 206 bp                                                       |  |
| in-XC2108-R | aagcttTTGTTCTGCAACGACTTG       | For insert inactivation mutant construction of <i>XC2108</i> |  |
| in-XC2562-F | gaattcATGCGTGTCCCTGCACTGGCT    | 302 bp                                                       |  |
| in-XC2562-R | aagcttTAAGCGTTGCTCAGCGACC      | For insert inactivation mutant construction of <i>XC2562</i> |  |
| C-XC0691-F  | AAGCTTATGTTCAAGAACTCCGCGG      | 1047 bp                                                      |  |
| C-XC0691-R  | GAATTCTCACTCCGGCGCGAAGAACT     | For <i>XC0691</i> complementation                            |  |
| C-XC1867-F  | AAGCTTATGCCGATGAGCCTGCGCCT     | 1374 bp                                                      |  |
| C-XC1867-R  | GAATTCTCATGCGCGCTTCCAGCGCA     | For <i>XC1867</i> complementation                            |  |
| C-XC2815-F  | AAGCTTATGAAGACCCGACTGCTCGT     | 480 bp                                                       |  |
| C-XC2815-R  | GAATTCGCGCAGCACGACCTTGCCGT     | For <i>XC2815</i> complementation                            |  |
| C-XC3633-F  | AAGCTTTTGGACATGATTCGGTCCGT     | 792 bp                                                       |  |
| C-XC3633-R  | GAATTCTCATAGCGCATCCACCATTT     | For <i>XC3633</i> complementation                            |  |
| C-PA4481-F  | AAGCTTATGTTCAAAAAATTGCGTGG     | 1038 bp                                                      |  |
| C-PA4481-R  | GAATTCTTACTCGGTGGAGAGCAGGT     | For <i>PA4481</i> complementation                            |  |
| C-PA1795-F  | AAGCTTGTGCTGCAGATCTACAACA      | 1383 bp                                                      |  |
| C-PA1795-R  | GAATTCTCAGTCGGCCAGGCGCCA       | For <i>PA1795</i> complementation                            |  |
| C-PA0973-F  | AAGCTTATGGAAATGCTGAAATTCGG     | 507 bp                                                       |  |
| C-PA0973-R  | GAATTCTTACTTCTTCAGCTCGACGC     | For <i>PA0973</i> complementation                            |  |
| C-PA5451-F  | AAGCTTATGCTTCTTGGCTTGTCT       | 798 bp                                                       |  |
| C-PA5451-R  | GAATTCTCAGAGTTCATCCACCAT       | For <i>PA5451</i> complementation                            |  |

**Table S3.** List of proteins (>1.2-fold) in the  $\Delta$ phoP\* mutant strain that were differentially expressed (>1.2-fold) between the induced and repressed conditions.

| Spot No.                                      | Protein code <sup>a</sup> | Protein name | Length (aa) | Protein annotation or description                                     | Theoretical MW (kDa) | pI   | Score <sup>b</sup> | Sequence coverage | Ratio <sup>c</sup> (ara <sup>d</sup> /IPTG) |
|-----------------------------------------------|---------------------------|--------------|-------------|-----------------------------------------------------------------------|----------------------|------|--------------------|-------------------|---------------------------------------------|
| <b>Amino acid biosynthesis and metabolism</b> |                           |              |             |                                                                       |                      |      |                    |                   |                                             |
| 33                                            | XC0194                    |              | 469         | Glutamine synthetase                                                  | 52.0                 | 5.20 | 201                | 39%               | 2.20                                        |
| 12                                            | XC1255                    |              | 460         | L-serine dehydratase                                                  | 50.2                 | 5.93 | 210                | 52%               | -2.13                                       |
| 24                                            | XC1367                    | PyrB         | 315         | Aspartate carbamoyltransferase                                        | 34.0                 | 5.94 | 137                | 52%               | -2.54                                       |
| 11                                            | XC1733                    |              | 498         | L-lysine 6-aminotransferase                                           | 53.9                 | 5.89 | 163                | 40%               | -2.07                                       |
| 45                                            | XC2351                    |              | 410         | Valine-pyruvate aminotransferase                                      | 44.6                 | 5.82 | 97                 | 40%               | 1.96                                        |
| 10                                            | XC2653                    | Hut1         | 401         | Imidazolonepropionase                                                 | 46.1                 | 5.77 | 135                | 28%               | -3.15                                       |
| 48                                            | XC2809                    |              | 387         | Glutaryl-CoA dehydrogenase                                            | 41.9                 | 5.94 | 156                | 36%               | 1.58                                        |
| 13                                            | XC3313                    |              | 478         | Family II 2-keto-3-deoxy-D-arabino-heptulosonate 7-phosphate synthase | 53.6                 | 5.90 | 301                | 59%               | -2.37                                       |
| 23                                            | XC3655                    |              | 367         | Cysteine synthase                                                     | 40.2                 | 5.96 | 124                | 47%               | -2.12                                       |
| <b>Carbohydrate metabolism</b>                |                           |              |             |                                                                       |                      |      |                    |                   |                                             |
| 49                                            | XC0944                    |              | 429         | Citrate synthase                                                      | 47.9                 | 5.88 | 104                | 40%               | 1.46                                        |
| 46                                            | XC0972                    |              | 333         | Glyceraldehyde-3-phosphate dehydrogenase                              | 36.2                 | 6.04 | 124                | 42%               | 1.39                                        |
| 6                                             | XC1952                    | PpsA         | 792         | Phosphoenolpyruvate synthase                                          | 86.5                 | 5.12 | 76                 | 10%               | 2.73                                        |
| 29                                            | XC2369                    | MtnB         | 217         | Sugar aldolase                                                        | 24.4                 | 5.92 | 217                | 34%               | -2.02                                       |
| 9                                             | XC2733                    |              | 448         | UDP-glucose dehydrogenase                                             | 49.0                 | 5.79 | 94                 | 21%               | 2.62                                        |
| 5                                             | XC3613                    |              | 351         | dTDP-glucose-4,6-dehydratase                                          | 38.7                 | 5.47 | 145                | 54%               | $-\infty$                                   |
| 14                                            | XC3674                    | GlmU         | 454         | UDP-N-acetylglucosamine pyrophosphorylase                             | 48.2                 | 6.23 | 177                | 44%               | -2.39                                       |
| 58                                            | XC3769                    |              | 398         | UDP-galactopyranose mutase                                            | 45.9                 | 5.94 | 159                | 58%               | -1.3                                        |
| 36                                            | XC3854                    |              | 743         | Isocitrate dehydrogenase                                              | 80.2                 | 5.50 | 138                | 40%               | 1.74                                        |
| 16                                            | XC4065                    |              | 521         | Beta-xylosidase                                                       | 58.5                 | 6.28 | 62                 | 16%               | 2.82                                        |
| <b>Energy metabolism and detoxification</b>   |                           |              |             |                                                                       |                      |      |                    |                   |                                             |



|                                                     |        |       |     |                                                        |      |      |     |     |           |
|-----------------------------------------------------|--------|-------|-----|--------------------------------------------------------|------|------|-----|-----|-----------|
| 26                                                  | XC0333 |       | 295 | Oxidoreductase                                         | 30.0 | 5.73 | 52  | 24% | -2.43     |
| 3                                                   | XC0796 |       | 279 | Glutaredoxin-like protein                              | 29.9 | 4.59 | 198 | 51% | $\infty$  |
| 42                                                  | XC1595 |       | 744 | NADH-ubiquinone oxidoreductase NQO3 subunit            | 79.9 | 6.15 | 158 | 44% | 1.53      |
| 0                                                   | XC3073 |       | 366 | Xenobiotic flavin oxidoreductase A                     | 39.6 | 6.06 | 50  | 20% | 1.52      |
| 7                                                   | XC3397 |       | 529 | Aalkyl hydroperoxide reductase subunit F               | 57.2 | 5.28 | 182 | 41% | 2.96      |
| 15                                                  | XC3689 |       | 213 | Dihydrolipoamide dehydrogenase                         | 21.5 | 5.35 | 78  | 44% | -2.11     |
| 2                                                   | XC3754 |       | 299 | Mn-containing catalase                                 | 32.4 | 4.70 | 301 | 49% | 1.34      |
| <b>Fatty acid metabolism</b>                        |        |       |     |                                                        |      |      |     |     |           |
| 1                                                   | XC1017 |       | 594 | Outer membrane lipase/esterase                         | 61.9 | 4.76 | 114 | 18% | 1.75      |
| 53                                                  | XC1516 |       | 291 | Geranyltranstransferase; farnesyl-diphosphate synthase | 30.3 | 5.65 | 88  | 36% | 1.62      |
| 47                                                  | XC2980 |       | 393 | Acyl-CoA dehydrogenase                                 | 42.6 | 5.96 | 202 | 62% | 1.34      |
| <b>Nucleic acid and protein metabolism</b>          |        |       |     |                                                        |      |      |     |     |           |
| 41                                                  | XC0004 | GyrB  | 814 | DNA gyrase subunit B                                   | 89.5 | 5.70 | 130 | 25% | 1.51      |
| 21                                                  | XC1324 | PurM  | 341 | Phosphoribosylformylglycinamide cyclo-ligase           | 36.0 | 4.73 | 63  | 25% | 2.43      |
| 39                                                  | XC1429 | GltX  | 467 | Glutamyl-tRNA synthetase                               | 52.1 | 5.39 | 225 | 54% | 1.56      |
| 37                                                  | XC1628 |       | 673 | Excinuclease ABC subunit B                             | 75.8 | 5.43 | 77  | 15% | 1.84      |
| 44                                                  | XC2534 | PyrG  | 554 | CTP synthetase                                         | 62.8 | 5.95 | 60  | 20% | 1.33      |
| 52                                                  | XC3619 |       | 309 | Acetyl transferase/isomerase                           | 33.5 | 5.80 | 73  | 52% | 1.91      |
| 22                                                  | XC3943 |       | 419 | DNA/pantothenate metabolism flavoprotein               | 43.7 | 6.01 | 139 | 56% | -2.02     |
| 40                                                  | XC4328 | TrmE  | 446 | Thiophene and furan oxidation protein                  | 47.7 | 5.39 | 113 | 45% | 1.92      |
| <b>Ribosome, protein biosynthesis and refolding</b> |        |       |     |                                                        |      |      |     |     |           |
| 55                                                  | XC0535 | GroEL | 546 | 60 kDa chaperonin                                      | 57.1 | 5.01 | 322 | 65% | -1.31     |
| 28                                                  | XC1492 |       | 301 | Peptidyl-prolyl cis-trans isomerase                    | 33.1 | 6.24 | 107 | 39% | 2.06      |
| 56                                                  | XC3342 | TufI  | 396 | Elongation factor Tu                                   | 43.4 | 5.45 | 255 | 56% | $-\infty$ |
| <b>Signal transduction</b>                          |        |       |     |                                                        |      |      |     |     |           |
| 34                                                  | XC1691 | FixL  | 540 | Sensor histidine kinase                                | 59.1 | 5.24 | 105 | 42% | 1.39      |
| 4                                                   | XC4031 | PhoP  | 227 | two-component system regulatory protein                | 25.4 | 5.19 | 441 | 66% | 2.19      |

| <b>Cell division</b>            |        |      |      |                                                    |      |      |     |     |       |  |
|---------------------------------|--------|------|------|----------------------------------------------------|------|------|-----|-----|-------|--|
| 25                              | XC3506 | FtsA | 411  | Cell division protein                              | 44.4 | 5.78 | 183 | 41% | -3.15 |  |
| <b>Transportation</b>           |        |      |      |                                                    |      |      |     |     |       |  |
| 32                              | XC0017 |      | 446  | Outer membrane protein                             | 47.1 | 5.18 | 575 | 62% | 1.65  |  |
| 35                              | XC1091 |      | 626  | Outer membrane receptor for transport of vitamin B | 68.2 | 5.22 | 259 | 52% | 1.55  |  |
| 54                              | XC4327 | Oar  | 1006 | Oar protein                                        | 10.6 | 4.68 | 263 | 45% | 1.48  |  |
| <b>Function unknown protein</b> |        |      |      |                                                    |      |      |     |     |       |  |
| 17 <sup>e</sup>                 | XC0215 |      | 198  | Conserved hypothetical protein                     | 21.8 | 4.60 | 76  | 47% | -2.38 |  |
| 51                              | XC1374 |      | 451  | Conserved hypothetical protein                     | 49.9 | 6.15 | 157 | 45% | 1.33  |  |
| 43                              | XC2373 |      | 554  | Conserved hypothetical protein                     | 60.3 | 5.97 | 54  | 24% | 1.56  |  |
| 18                              | XC3095 |      | 134  | Conserved hypothetical protein                     | 14.9 | 6.28 | 134 | 51% | -2.15 |  |
| 27                              | XC3393 |      | 265  | Conserved hypothetical protein                     | 28.9 | 6.55 | 59  | 30% | -2.01 |  |
| 20                              | XC3882 |      | 165  | Conserved hypothetical protein                     | 16.7 | 4.82 | 89  | 43% | 2.11  |  |
| 30                              | XC4228 |      | 222  | Conserved hypothetical protein                     | 24.1 | 6.08 | 98  | 46% | 2.08  |  |

<sup>a</sup> Names and codes of identified proteins are according to genomic annotation of *X. campestris* pv. *campestris* 8004.

<sup>b</sup> Scores are based of Mascot search. Scores greater than 49 are significant ( $p < 0.05$ ).

<sup>c</sup> The ratio is the relative expression level of a protein under arabinose stimulation vs. IPTG stimulation. Fragments of these proteins were identified from different sites of the gels.

<sup>d</sup> ara represent L-arabinose treated condition.

<sup>e</sup> XC0215 was identified in another point, with a relative expression level of -2.01 (Mascot search score = 316)

**Table S4.** ChIP-seq analysis identified genes with promoter regions bound by PhoP in *X. campestris*. pv. *campestris*

| No             | Growth condition | Gene   | Annotation <sup>a</sup>                | Strand <sup>b</sup> | Peak Z-score | Peak start:end      | Peak position | Classification           |
|----------------|------------------|--------|----------------------------------------|---------------------|--------------|---------------------|---------------|--------------------------|
| 1 <sup>c</sup> | L-arabinose      | XC0017 | Outer membrane protein                 | -                   | 5.69         | 20741:<br>21207     | 20982         | Transportation           |
| 2              | L-arabinose      | XC0018 | Conserved hypothetical protein         | +                   | 5.69         | 20741:<br>21207     | 20982         | Function unknown protein |
| 3              | L-arabinose      | XC0136 | RhsD protein                           | +                   | 2.00         | 165044:<br>167218   | 166891        | Stress response          |
| 4              | L-arabinose      | XC0215 | Conserved hypothetical protein         | -                   | 4.77         | 263259:<br>263668   | 263464        | Function unknown protein |
| 5              | L-arabinose      | XC0220 | Conserved hypothetical protein         | -                   | 8.82         | 266928:<br>267479   | 267123        | Function unknown protein |
| 6              | L-arabinose      | XC0627 | D-serine/D-alanine/glycine transporter | +                   | 1.71         | 746367:<br>746782   | 746682        | Transportation           |
| 7              | L-arabinose      | XC0758 | Soluble lytic murein transglycosylase  | -                   | 6.12         | 910043:<br>910498   | 910266        | Cell division            |
| 8              | L-arabinose      | XC0759 | TonB-dependent receptor                | +                   | 6.12         | 910043:<br>910498   | 910266        | Transportation           |
| 9              | L-arabinose      | XC0849 | TonB-dependent receptor                | +                   | 1.71         | 1025496:<br>1025737 | 1025611       | Transportation           |
| 10             | L-arabinose      | XC0860 | Conserved hypothetical protein         | -                   | 2.23         | 1039352:<br>1040196 | 1039611       | Function unknown protein |
| 11             | L-arabinose      | XC0866 | Conserved hypothetical protein         | -                   | 1.97         | 1045215:<br>1045653 | 1045367       | Function unknown protein |
| 12             | L-arabinose      | XC1022 | Regulatory protein bphR                | -                   | 2.38         | 1235858:<br>1236983 | 1236550       | Signal transduction      |

|    |             |        |                                      |   |      |                     |         |                          |
|----|-------------|--------|--------------------------------------|---|------|---------------------|---------|--------------------------|
| 13 | L-arabinose | XC1030 | Conserved hypothetical protein       | + | 1.73 | 1245629:<br>1245874 | 1245675 | Function unknown protein |
| 14 | L-arabinose | XC1079 | Ferric enterobactin receptor         | - | 2.43 | 1303499:<br>1303819 | 1303627 | Transportation           |
| 15 | L-arabinose | XC1110 | Cation:proton antiporter             | - | 2.48 | 1341738:<br>1342118 | 1341930 | Transportation           |
| 16 | L-arabinose | XC1113 | Ferric enterobactin receptor         | - | 2.91 | 1349297:<br>1349693 | 1349515 | Transportation           |
| 17 | L-arabinose | XC1235 | beta-lactamase                       | - | 6.84 | 1511442:<br>1511866 | 1511670 | Stress response          |
| 18 | L-arabinose | XC1236 | Conserved hypothetical protein       | + | 6.84 | 1511442:<br>1511866 | 1511670 | Function unknown protein |
| 19 | L-arabinose | XC1305 | Conserved hypothetical protein       | - | 8.31 | 1597236:<br>1597678 | 1597441 | Function unknown protein |
| 20 | L-arabinose | XC1306 | Phosphotransferase system HPr enzyme | - | 8.31 | 1597236:<br>1597678 | 1597441 | Carbohydrate metabolism  |
| 21 | L-arabinose | XC1415 | Conserved hypothetical protein       | - | 7.72 | 1707914:<br>1708353 | 1708175 | Function unknown protein |
| 22 | L-arabinose | XC1422 | Cysteine protease                    | - | 2.25 | 1718240:<br>1718512 | 1718358 | Proteolysis              |
| 23 | L-arabinose | XC1474 | RNA polymerase ECF-type sigma factor | - | 5.28 | 1773368:<br>1773850 | 1773613 | Signal transduction      |
| 24 | L-arabinose | XC1475 | ATP-dependent RNA helicase           | + | 5.28 | 1773368:<br>1773850 | 1773613 | Macromolecule metabolism |
| 25 | L-arabinose | XC1546 | TonB-dependent receptor              | - | 4.36 | 1863561:<br>1863967 | 1863767 | Transportation           |
| 26 | L-arabinose | XC1635 | VirB11 protein                       | + | 2.06 | 1961161:<br>1961920 | 1961334 | Secretion system         |

|    |             |        |                                 |   |       |                     |         |                          |
|----|-------------|--------|---------------------------------|---|-------|---------------------|---------|--------------------------|
| 27 | L-arabinose | XC1638 | VirB3 protein                   | + | 2.25  | 1963675:<br>1964396 | 1963906 | Secretion system         |
| 28 | L-arabinose | XC1800 | 3-methyladenine DNA glycosylase | - | 5.16  | 2189141:<br>2189544 | 2189333 | Macromolecule metabolism |
| 29 | L-arabinose | XC1801 | Chemotaxis protein              | + | 5.16  | 2189141:<br>2189544 | 2189333 | Stress response          |
| 30 | L-arabinose | XC1867 | CysteinyI-tRNA synthetase       | - | 11.92 | 2261976:<br>2262432 | 2262219 | Macromolecule metabolism |
| 31 | L-arabinose | XC1868 | Conserved hypothetical protein  | + | 11.92 | 2261976:<br>2262432 | 2262219 | Function unknown protein |
| 32 | L-arabinose | XC1969 | Cytochrome C4                   | - | 3.03  | 2375920:<br>2376285 | 2376097 | Energy metabolism        |
| 33 | L-arabinose | XC1970 | Cation efflux system protein    | + | 3.03  | 2375920:<br>2376285 | 2376097 | Transportation           |
| 34 | L-arabinose | XC2167 | Conserved hypothetical protein  | - | 2.95  | 2612885:<br>2613234 | 2613059 | Function unknown protein |
| 35 | L-arabinose | XC2319 | Conserved hypothetical protein  | + | 2.75  | 2801540:<br>2801857 | 2801667 | Function unknown protein |
| 36 | L-arabinose | XC2428 | Ankyrin repeat protein          | - | 1.69  | 2942759:<br>2943042 | 2942913 | Signal transduction      |
| 37 | L-arabinose | XC2506 | Carbon storage regulator,CsrA   | - | 2.64  | 3035495:<br>3035905 | 3035778 | Trnstransduction         |
| 38 | L-arabinose | XC2535 | Conserved hypothetical protein  | - | 3.25  | 3066045:<br>3066478 | 3066270 | Function unknown protein |
| 39 | L-arabinose | XC2536 | Topoisomerase IV subunit B      | + | 3.25  | 3066045:<br>3066478 | 3066270 | Macromolecule metabolism |
| 40 | L-arabinose | XC2607 | Conserved hypothetical protein  | - | 2.23  | 3148508:<br>3148818 | 3148667 | Function unknown protein |

|    |             |        |                                |   |      |                     |         |                          |
|----|-------------|--------|--------------------------------|---|------|---------------------|---------|--------------------------|
| 41 | L-arabinose | XC2705 | Hypothetical protein           | - | 2.71 | 3250675:<br>3250990 | 3250850 | Function unknown protein |
| 42 | L-arabinose | XC2810 | Conserved hypothetical protein | - | 3.67 | 3383766:<br>3384176 | 3383999 | Function unknown protein |
| 43 | L-arabinose | XC2811 | Conserved hypothetical protein | + | 3.67 | 3383766:<br>3384176 | 3383999 | Function unknown protein |
| 44 | L-arabinose | XC2828 | Conserved hypothetical protein | - | 2.06 | 3401130:<br>3401410 | 3401273 | Function unknown protein |
| 45 | L-arabinose | XC2899 | TonB-dependent receptor        | + | 3.62 | 3481926:<br>3482320 | 3482121 | Transportation           |
| 46 | L-arabinose | XC2921 | Conserved hypothetical protein | - | 2.96 | 3507165:<br>3507504 | 3507345 | Function unknown protein |
| 47 | L-arabinose | XC2991 | beta-glucosidase               | - | 1.67 | 3586406:<br>3586945 | 3586548 | Virulence                |
| 48 | L-arabinose | XC2994 | Conserved hypothetical protein | - | 2.12 | 3590975:<br>3591543 | 3591158 | Function unknown protein |
| 49 | L-arabinose | XC3004 | HrpB8 protein                  | - | 1.51 | 3600612:<br>3600880 | 3600721 | Secretion system         |
| 50 | L-arabinose | XC3022 | HpaB protein                   | + | 2.08 | 3613348:<br>3613680 | 3613530 | Secretion system         |
| 51 | L-arabinose | XC3029 | Alcohol dehydrogenase          | - | 1.53 | 3624113:<br>3624554 | 3624214 | Carbohydrate metabolism  |
| 52 | L-arabinose | XC3032 | Tryptophan 2,3-dioxygenase     | - | 1.97 | 3627455:<br>3627937 | 3627568 | Macromolecule metabolism |
| 53 | L-arabinose | XC3127 | Conserved hypothetical protein | + | 5.00 | 3731556:<br>3734825 | 3733079 | Function unknown protein |
| 54 | L-arabinose | XC3240 | Outer membrane protein Slp     | + | 9.46 | 3885409:<br>3885854 | 3885631 | Stress response          |

|    |             |        |                                     |   |       |                     |         |                          |
|----|-------------|--------|-------------------------------------|---|-------|---------------------|---------|--------------------------|
| 55 | L-arabinose | XC3300 | Outer membrane protein              | - | 2.98  | 3952097:<br>3952633 | 3952309 | Transportation           |
| 56 | L-arabinose | XC3301 | Oxidoreductase                      | + | 2.98  | 3952097:<br>3952633 | 3952309 | Energy metabolism        |
| 57 | L-arabinose | XC3326 | 30S ribosomal protein S8            | - | 1.83  | 3978308:<br>3978515 | 3978408 | Macromolecule metabolism |
| 58 | L-arabinose | XC3379 | Extracellular protease              | - | 3.72  | 4030111:<br>4030541 | 4030310 | Virulence                |
| 59 | L-arabinose | XC3452 | PgrR                                | - | 10.43 | 4099239:<br>4101139 | 4100778 | Signal transduction      |
| 60 | L-arabinose | XC3518 | Conserved hypothetical protein      | - | 2.97  | 4180281:<br>4180614 | 4180449 | Function unknown protein |
| 61 | L-arabinose | XC3519 | Conserved hypothetical protein      | + | 2.97  | 4180281:<br>4180614 | 4180449 | Function unknown protein |
| 62 | L-arabinose | XC3545 | conserved hypothetical protein      | - | 4.40  | 4208346:<br>4208795 | 4208590 | Function unknown protein |
| 63 | L-arabinose | XC3546 | ABC transporter ATP-binding protein | + | 4.40  | 4208346:<br>4208795 | 4208590 | Transportation           |
| 64 | L-arabinose | XC3549 | Conserved hypothetical protein      | + | 3.20  | 4212221:<br>4212577 | 4212396 | Function unknown protein |
| 65 | L-arabinose | XC3576 | Outer membrane protein              | - | 1.94  | 4250643:<br>4250903 | 4250748 | Transportation           |
| 66 | L-arabinose | XC3610 | dTDP-4-dehydrorhamnose reductase    | - | 1.85  | 4292861:<br>4293130 | 4293016 | Energy metabolism        |
| 67 | L-arabinose | XC3621 | Conserved hypothetical protein      | + | 2.25  | 4301008:<br>4302788 | 4302535 | Function unknown protein |
| 68 | L-arabinose | XC3631 | Putative kinase WxcB                | - | 1.79  | 4311956:<br>4312972 | 4312553 | Carbohydrate metabolism  |



|    |             |        |                                |   |       |                     |         |                          |
|----|-------------|--------|--------------------------------|---|-------|---------------------|---------|--------------------------|
| 69 | L-arabinose | XC3799 | Transcriptional regulator      | - | 1.82  | 4493133:<br>4493466 | 4493304 | Signal transduction      |
| 70 | L-arabinose | XC3806 | RNA polymerase sigma-70 factor | - | 4.72  | 4501460:<br>4501882 | 4501683 | Transcription            |
| 71 | L-arabinose | XC3843 | RNA polymerase sigma-32 factor | - | 2.01  | 4541520:<br>4541780 | 4541685 | Transcription            |
| 72 | L-arabinose | XC3870 | Conserved hypothetical protein | - | 2.09  | 4575636:<br>4575974 | 4575854 | Function unknown protein |
| 73 | L-arabinose | XC3925 | Tyrosyl-tRNA synthetase        | - | 4.67  | 4639315:<br>4639706 | 4639513 | Macromolecule metabolism |
| 74 | L-arabinose | XC3926 | Conserved hypothetical protein | + | 4.67  | 4639315:<br>4639706 | 4639513 | Function unknown protein |
| 75 | L-arabinose | XC3973 | Conserved hypothetical protein | - | 2.39  | 4692449:<br>4692923 | 4692620 | Function unknown protein |
| 76 | L-arabinose | XC3974 | Hypothetical protein           | - | 2.39  | 4692449:<br>4692923 | 4692620 | Function unknown protein |
| 77 | L-arabinose | XC3975 | Conserved hypothetical protein | + | 2.39  | 4692449:<br>4692923 | 4692620 | Function unknown protein |
| 78 | L-arabinose | XC3985 | Histone H1                     | - | 3.78  | 4701326:<br>4701712 | 4701496 | Signal transduction      |
| 79 | L-arabinose | XC3986 | Protease Do                    | + | 3.78  | 4701326:<br>4701712 | 4701496 | Proteolysis              |
| 80 | L-arabinose | XC4031 | PhoP                           | - | 36.13 | 4747193:<br>4748123 | 4747401 | Signal transduction      |
| 81 | L-arabinose | XC4290 | Hemagglutinin                  | - | 2.64  | 5094677:<br>5094999 | 5094873 | Virulence                |
| 82 | L-arabinose | XC4295 | Conserved hypothetical protein | - | 2.99  | 5097596:<br>5097983 | 5097786 | Function unknown protein |

|    |             |        |                                       |   |       |                     |         |                          |
|----|-------------|--------|---------------------------------------|---|-------|---------------------|---------|--------------------------|
| 83 | L-arabinose | XC4296 | Toluene tolerance protein             | + | 2.99  | 5097596:<br>5097983 | 5097786 | Stress response          |
| 84 | L-arabinose | XC4327 | Oar protein                           | + | 14.88 | 5138422:<br>5138919 | 5138660 | Transportation           |
|    |             |        |                                       |   |       |                     |         |                          |
| 1  | IPTG        | XC0017 | Outer membrane protein                | - | 4.70  | 20756:<br>21196     | 20998   | Transportation           |
| 2  | IPTG        | XC0018 | Conserved hypothetical protein        | + | 4.70  | 20756:<br>21196     | 20998   | Function unknown protein |
| 3  | IPTG        | XC0131 | Conserved hypothetical protein        | + | 1.66  | 160874:<br>161140   | 161071  | Function unknown protein |
| 4  | IPTG        | XC0215 | Conserved hypothetical protein        | - | 4.27  | 263275:<br>263688   | 263506  | Function unknown protein |
| 5  | IPTG        | XC0220 | Conserved hypothetical protein        | - | 6.50  | 266937:<br>267477   | 267125  | Function unknown protein |
| 6  | IPTG        | XC0758 | Soluble lytic murein transglycosylase | - | 5.49  | 910062:<br>910483   | 610276  | Stress response          |
| 7  | IPTG        | XC0759 | TonB-dependent receptor               | + | 5.49  | 910062:<br>910483   | 910276  | Transportation           |
| 8  | IPTG        | XC0844 | Prolyl oligopeptidase family protein  | - | 2.33  | 1019073:<br>1019460 | 1019288 | Proteolysis              |
| 9  | IPTG        | XC0860 | Conserved hypothetical protein        | - | 1.71  | 1039781:<br>1040149 | 1040012 | Function unknown protein |
| 10 | IPTG        | XC0866 | Conserved hypothetical protein        | - | 1.55  | 1045282:<br>1045522 | 1045397 | Function unknown protein |
| 11 | IPTG        | XC1079 | Ferric enterobactin receptor          | - | 2.44  | 1303508:<br>1303847 | 1303650 | Transportation           |
| 12 | IPTG        | XC1080 | Conserved hypothetical protein        | + | 2.44  | 1303508:            | 1303650 | Function unknown protein |

|    |      |        |                                      |   |      |                     |         |                          |
|----|------|--------|--------------------------------------|---|------|---------------------|---------|--------------------------|
|    |      |        |                                      |   |      | 1303847             |         |                          |
| 13 | IPTG | XC1113 | Ferric enterobactin receptor         | - | 2.86 | 1349310:<br>1349736 | 1349479 | Function unknown protein |
| 14 | IPTG | XC1141 | TolB protein                         | + | 1.86 | 1382994:<br>1383388 | 1383259 | Function unknown protein |
| 15 | IPTG | XC1235 | beta-lactamase                       | - | 6.06 | 1511440:<br>1511866 | 1511651 | Stress response          |
| 16 | IPTG | XC1236 | Conserved hypothetical protein       | + | 6.06 | 1511440:<br>1511866 | 1511651 | Function unknown protein |
| 17 | IPTG | XC1305 | Phosphotransferase system HPr enzyme | - | 6.31 | 1597228:<br>1597670 | 1597457 | Carbohydrate metabolism  |
| 18 | IPTG | XC1306 | Conserved hypothetical protein       | - | 6.31 | 1597228:<br>1597670 | 1597457 | Function unknown protein |
| 19 | IPTG | XC1415 | Conserved hypothetical protein       | - | 7.61 | 1707905:<br>1708350 | 1708122 | Function unknown protein |
| 20 | IPTG | XC1474 | RNA polymerase ECF-type sigma factor | - | 3.82 | 1773373:<br>1773853 | 1773623 | Transcription            |
| 21 | IPTG | XC1475 | ATP-dependent RNA helicase           | + | 3.82 | 1773373:<br>1773853 | 1773623 | Macromolecule metabolism |
| 22 | IPTG | XC1534 | Conserved hypothetical protein       | - | 2.01 | 1843394:<br>1843696 | 1843580 | Function unknown protein |
| 23 | IPTG | XC1546 | TonB-dependent receptor              | - | 4.54 | 1863582:<br>1863997 | 1863788 | Transportation           |
| 24 | IPTG | XC1635 | VirB11 protein                       | + | 1.81 | 1961345:<br>1961652 | 1961440 | Secretion system         |
| 25 | IPTG | XC1800 | 3-methyladenine DNA glycosylase      | - | 4.51 | 2189143:<br>2189553 | 2189329 | Macromolecule metabolism |
| 26 | IPTG | XC1801 | Chemotaxis protein                   | + | 4.51 | 2189143:            | 2189329 | Stress response          |

|    |      |        |                                |   |       |                     |         |                          |
|----|------|--------|--------------------------------|---|-------|---------------------|---------|--------------------------|
|    |      |        |                                |   |       | 2189553             |         |                          |
| 27 | IPTG | XC1867 | CysteinyI-tRNA synthetase      | - | 10.00 | 2261975:<br>2262443 | 2262233 | Macromolecule metabolism |
| 28 | IPTG | XC1868 | Conserved hypothetical protein | + | 10.00 | 2261975:<br>2262443 | 2262233 | Function unknown protein |
| 29 | IPTG | XC1969 | Cytochrome C4                  | - | 2.89  | 2375906:<br>2376234 | 2376071 | Energy metabolism        |
| 30 | IPTG | XC1970 | Cation efflux system protein   | + | 2.89  | 2375906:<br>2376234 | 2376071 | Transportation           |
| 31 | IPTG | XC2018 | Conserved hypothetical protein | + | 1.93  | 2432061:<br>2432300 | 2432195 | Function unknown protein |
| 32 | IPTG | XC2228 | c-di-GMP phosphodiesterase A   | + | 3.66  | 2684448:<br>2688647 | 2687666 | Signal transduction      |
| 33 | IPTG | XC2506 | Carbon storage regulator       | - | 2.33  | 3035555:<br>3035905 | 3035769 | Signal transduction      |
| 34 | IPTG | XC2535 | Conserved hypothetical protein | - | 3.07  | 3066064:<br>3066466 | 3066303 | Function unknown protein |
| 35 | IPTG | XC2536 | Topoisomerase IV subunit B     | + | 3.07  | 3066064:<br>3066466 | 3066303 | Macromolecule metabolism |
| 36 | IPTG | XC2607 | Conserved hypothetical protein | - | 2.27  | 3148422:<br>3148844 | 3148664 | Function unknown protein |
| 37 | IPTG | XC2705 | Hypothetical protein           | - | 2.34  | 3250670:<br>3251008 | 3250814 | Function unknown protein |
| 38 | IPTG | XC2811 | Conserved hypothetical protein | + | 2.96  | 3383802:<br>3384159 | 3383956 | Function unknown protein |
| 39 | IPTG | XC2899 | TonB-dependent receptor        | + | 2.93  | 3481929:<br>3482294 | 3482114 | Transportation           |
| 40 | IPTG | XC2921 | Conserved hypothetical protein | - | 2.82  | 3507161:            | 3507316 | Function unknown protein |

|    |      |        |                                     |   |      |                     |         |                          |
|----|------|--------|-------------------------------------|---|------|---------------------|---------|--------------------------|
|    |      |        |                                     |   |      | 3507457             |         |                          |
| 41 | IPTG | XC2994 | Conserved hypothetical protein      | - | 1.67 | 3591247:<br>3591586 | 3591413 | Function unknown protein |
| 42 | IPTG | XC3127 | Conserved hypothetical protein      | + | 5.11 | 3731486:<br>3734859 | 3733093 | Function unknown protein |
| 43 | IPTG | XC3136 | Hypothetical protein                | - | 1.57 | 3749147:<br>3749347 | 3749194 | Function unknown protein |
| 44 | IPTG | XC3240 | Outer membrane protein Slp          | + | 6.81 | 3885418:<br>3885858 | 3885652 | Stress response          |
| 45 | IPTG | XC3257 | Conserved hypothetical protein      | - | 2.25 | 3899542:<br>3899897 | 3899727 | Function unknown protein |
| 46 | IPTG | XC3300 | Outer membrane protein              | - | 2.30 | 3952150:<br>3952568 | 3952345 | Transportation           |
| 47 | IPTG | XC3326 | 30S ribosomal protein S8            | - | 1.80 | 3978303:<br>3978503 | 3978394 | Macromolecule metabolism |
| 48 | IPTG | XC3379 | Extracellular protease              | - | 2.90 | 4030103:<br>4030481 | 4030269 | Virulence                |
| 49 | IPTG | XC3452 | PgrR                                | - | 8.13 | 4099219:<br>4101185 | 4100779 | Signal transduction      |
| 50 | IPTG | XC3518 | Conserved hypothetical protein      | - | 3.18 | 4180246:<br>4180622 | 4180417 | Function unknown protein |
| 51 | IPTG | XC3519 | Conserved hypothetical protein      | + | 3.18 | 4180246:<br>4180622 | 4180417 | Function unknown protein |
| 52 | IPTG | XC3545 | Conserved hypothetical protein      | - | 3.67 | 4208392:<br>4208790 | 4208581 | Function unknown protein |
| 53 | IPTG | XC3546 | ABC transporter ATP-binding protein | + | 3.67 | 4208392:<br>4208790 | 4208581 | Transportation           |
| 54 | IPTG | XC3549 | Conserved hypothetical protein      | + | 2.96 | 4212222:            | 4212396 | Function unknown protein |

|    |      |        |                                |   |       |                     |         |                          |
|----|------|--------|--------------------------------|---|-------|---------------------|---------|--------------------------|
|    |      |        |                                |   |       | 4212572             |         |                          |
| 55 | IPTG | XC3576 | Outer membrane protein         | - | 2.12  | 4250683:<br>4250943 | 4250800 | Transportation           |
| 56 | IPTG | XC3585 | Leucyl aminopeptidase          | + | 4.16  | 4261331:<br>4261970 | 4261535 | Proteolysis              |
| 57 | IPTG | XC3620 | Sugar translocase              | + | 1.69  | 4300375:<br>4300829 | 4300604 | Transportation           |
| 58 | IPTG | XC3628 | Membrane protein WxcE          | - | 1.62  | 4308487:<br>4308919 | 4308685 | Carbohydrate metabolism  |
| 59 | IPTG | XC3693 | Conserved hypothetical protein | - | 3.10  | 4381037:<br>4381439 | 4381230 | Function unknown protein |
| 60 | IPTG | XC3694 | Outer membrane protein         | + | 3.10  | 4381037:<br>4381439 | 4381230 | Transportation           |
| 61 | IPTG | XC3806 | RNA polymerase sigma-70 factor | - | 3.98  | 4501480:<br>4501877 | 4501683 | Transcription            |
| 62 | IPTG | XC3870 | Conserved hypothetical protein | - | 1.94  | 4575682:<br>4575973 | 4575817 | Function unknown protein |
| 63 | IPTG | XC3926 | Conserved hypothetical protein | + | 4.36  | 4639312:<br>4639693 | 4639501 | Function unknown protein |
| 64 | IPTG | XC3974 | Hypothetical protein           | - | 2.19  | 4692486:<br>4692917 | 4692682 | Function unknown protein |
| 65 | IPTG | XC3975 | Conserved hypothetical protein | + | 2.19  | 4692486:<br>4692917 | 4692682 | Function unknown protein |
| 66 | IPTG | XC3985 | Histone H1                     | - | 2.97  | 4701342:<br>4701731 | 4701510 | Signal transduction      |
| 67 | IPTG | XC3986 | Protease Do                    | + | 2.97  | 4701342:<br>4701731 | 4701510 | Proteolysis              |
| 68 | IPTG | XC4031 | PhoP                           | - | 32.33 | 4747175:            | 4747399 | Signal transduction      |

|    |      |        |                                |   |       |                     |         |                          |
|----|------|--------|--------------------------------|---|-------|---------------------|---------|--------------------------|
|    |      |        |                                |   |       | 4748105             |         |                          |
| 69 | IPTG | XC4295 | Conserved hypothetical protein | - | 3.02  | 5097569:<br>5097979 | 5097795 | Function unknown protein |
| 70 | IPTG | XC4296 | Toluene tolerance protein      | + | 3.02  | 5097569:<br>5097979 | 5097795 | Stress response          |
| 71 | IPTG | XC4327 | Oar protein                    | + | 12.92 | 5138441:<br>5138932 | 5138658 | Transportation           |

<sup>a</sup> Names and codes of identified genes are according to genomic annotation of *X. campestris* pv. *campestris* 8004.

<sup>b</sup> “-” represents anti-sense strand; “+” represents sense strand.

<sup>c</sup> Yellow highlight genes that were retrieved from both IPTG and L-arabinose treated bacterial samples.



**Table S5.** Theoretical prediction identified bacterial genes with a PhoP binding motif in the promoter region.

| No.                                                      | PID      | Gene name | Gene function                                | Motif_sequence |
|----------------------------------------------------------|----------|-----------|----------------------------------------------|----------------|
| <i>Xanthomonas campestris</i> pv. <i>campestris</i> 8004 |          |           |                                              |                |
| 1                                                        | 66571713 | XC_0029   | alcohol dehydrogenase                        | CCATTCACG      |
| 2                                                        | 66571804 | XC_0123   | TonB-dependent receptor                      | TTGTTCATG      |
| 3                                                        |          | XC_0145   |                                              | CTGTTACAG      |
| 4                                                        | 66571863 | XC_0186   | cardiolipin synthase                         | ACGTTCATT      |
| 5                                                        | 66571922 | XC_0245   | transcriptional regulator araC family        | CTGTTACACC     |
| 6                                                        | 66571951 | XC_0274   | organic hydroperoxide resistance protein     | TCATTCATT      |
| 7                                                        | 66571956 | XC_0280   | quinone oxidoreductase                       | CCATTCACT      |
| 8                                                        | 66572013 | XC_0338   | conserved hypothetical protein               | TCATTCAGC      |
| 9                                                        | 66572020 | XC_0345   | xanthomonadin biosynthesis related protein 1 | TCATTCATG      |
| 10                                                       | 66572031 | XC_0356   | dihydroxy-acid dehydratase                   | CTGTTACACC     |
| 11                                                       | 66572039 | XC_0364   | conserved hypothetical protein               | ACGTTCAGT      |
| 12                                                       | 66572066 | XC_0391   | threonine dehydratase                        | ATGTTCATT      |
| 13                                                       | 66572101 | XC_0427   | glycogen debranching enzyme                  | TCGTTACACC     |
| 14                                                       | 66572106 | XC_0432   | outer membrane protein                       | TTGTTCATG      |
| 15                                                       | 66572234 | XC_0563   | conserved hypothetical protein               | CTGTTCATT      |
| 16                                                       | 66572312 | XC_0642   | ferripyoverdine receptor                     | ATATTCATT      |
| 17                                                       | 66572317 | XC_0647   | two-component system sensor protein          | CTGTTCATG      |
| 18                                                       | 66572360 | XC_0691   | rod shape-determining protein                | ATGTTCAGG      |
| 19                                                       | 66572373 | XC_0705   | endopolygalacturonase                        | CCATTCACC      |
| 20                                                       | 66572377 | XC_0709   | conserved hypothetical protein               | ATGTTACAG      |
| 21                                                       | 66572384 | XC_0716   | transcriptional regulator                    | TCATTCATG      |

|           |          |         |                                              |            |         |            |
|-----------|----------|---------|----------------------------------------------|------------|---------|------------|
| <b>22</b> | 66572396 | XC_0728 | two-component system sensor protein          | CCATTCAGC  |         |            |
| <b>23</b> | 66572410 | XC_0742 | type II secretion system protein G           | TCG TTCACC |         |            |
| <b>24</b> | 66572444 | XC_0776 | conserved hypothetical protein               | CCG TTCATC |         |            |
| <b>25</b> | 66572477 | XC_0812 | two-component system regulatory protein      | CTATTCACG  |         |            |
| <b>26</b> | 66572484 | XC_0819 | polyphosphate-selective porin O              | CTG TTCATT |         |            |
| <b>27</b> | 66572486 | XC_0821 | NADP-dependent malic enzyme                  | TTG TTCAGG |         |            |
| <b>28</b> | 66572509 | XC_0844 | prolyl oligopeptidase family protein         | TCG TTCAGC |         |            |
| <b>29</b> | 66572516 | XC_0851 | inorganic pyrophosphatase                    | CTATTCAGT  |         |            |
| <b>30</b> | 66572519 | XC_0854 | conserved hypothetical protein               | ATG TTCATG |         |            |
| <b>31</b> | 66572520 | XC_0855 | conserved hypothetical protein               | TCG TTCACC |         |            |
| <b>32</b> | 66572580 | XC_0916 | transcriptional regulator blaI family        | ATG TTCAGT |         |            |
| <b>33</b> | 66572587 | XC_0923 | transcriptional regulator                    | CCG TTCACT |         |            |
| <b>34</b> | 66572635 | XC_0971 | conserved hypothetical protein               | ATATTCACG  |         |            |
| <b>35</b> | 66572639 | XC_0975 | conserved hypothetical protein               | TCG TTCATG |         |            |
| <b>36</b> | 66572656 | XC_0992 | NADPH-sulfite reductase flavoprotein subunit | TCG TTCATC |         |            |
| <b>37</b> | 66572681 | XC_1017 | lipase/esterase                              | ATG TTCATG |         |            |
| <b>38</b> | 66572699 | XC_1038 | conserved hypothetical protein               | TTATTCAGC  |         |            |
| <b>39</b> | 66572720 | XC_1060 | pilus biogenesis protein                     | CTATTCAGT  |         |            |
| <b>40</b> | 66572733 | XC_1073 | conserved hypothetical protein               | CCATTCATT  |         |            |
| <b>41</b> | 66572740 | XC_1080 | conserved hypothetical protein               | TTG TTCAGG |         |            |
| <b>42</b> | 66572778 | XC_1118 | transcriptional activator ampR family        | ACG TTCACC |         |            |
| <b>43</b> | 66572788 | XC_1128 | aspartyl-tRNA synthetase                     | CTATTCAGC  |         |            |
| <b>44</b> | 66572801 | XC_1141 | TolB protein                                 | TCG TTCATG | 3834475 | TTG TTCAGC |
| <b>45</b> | 66572844 | XC_1184 | PilH protein                                 | CCATTCACC  |         |            |

|    |          |         |                                             |            |
|----|----------|---------|---------------------------------------------|------------|
| 46 | 66572886 | XC_1227 | sulfite synthesis pathway protein           | CTG TTCATT |
| 47 | 66572894 | XC_1235 | beta-lactamase                              | CCATTCATC  |
| 48 | 66572930 | XC_1271 | conserved hypothetical protein              | CTG TTCACC |
| 49 | 66572951 | XC_1292 | endoproteinase Arg-C                        | ATATTCAGC  |
| 50 | 66572965 | XC_1306 | conserved hypothetical protein              | CCATTCATT  |
| 51 | 66572966 | XC_1307 | conserved hypothetical protein              | ATG TTCATC |
| 52 | 66572974 | XC_1315 | conserved hypothetical protein              | ACATTCACG  |
| 53 | 66572979 | XC_1320 | conserved hypothetical protein              | ACG TTCACC |
| 54 | 66572981 | XC_1322 | 5'-phosphoribosylglycinamide transformylase | TCG TTCATG |
| 55 | 66572988 | XC_1329 | conserved hypothetical protein              | CTG TTCAGC |
| 56 | 66573021 | XC_1362 | conserved hypothetical protein              | ACATTCAGG  |
| 57 | 66573037 | XC_1378 | single-stranded DNA binding protein         | ACATTCATC  |
| 58 | 66573043 | XC_1384 | alcohol dehydrogenase                       | TTG TTCACG |
| 59 | 66573075 | XC_1417 | conserved hypothetical protein              | TCATTCACG  |
| 60 | 66573119 | XC_1461 | conserved hypothetical protein              | ACATTCAGG  |
| 61 | 66573132 | XC_1474 | RNA polymerase ECF-type sigma factor        | TTG TTCAGG |
| 62 | 66573156 | XC_1498 | lipoprotein                                 | CCG TTCACG |
| 63 | 66573163 | XC_1505 | outer membrane protein                      | ATATTCATC  |
| 64 | 66573168 | XC_1510 | TldD protein                                | ACG TTCAGC |
| 65 | 66573169 | XC_1511 | conserved hypothetical protein              | CCG TTCATG |
| 66 | 66573190 | XC_1534 | conserved hypothetical protein              | TTATTCAGG  |
| 67 | 66573227 | XC_1571 | conserved hypothetical protein              | ACG TTCAGT |
| 68 | 66573295 | XC_1639 | VirB4 protein                               | CTATTCAGG  |
| 69 | 66573298 | XC_1642 | alpha-glucosidase                           | CTATTCATG  |

|           |          |         |                                                       |             |         |             |
|-----------|----------|---------|-------------------------------------------------------|-------------|---------|-------------|
| <b>70</b> | 66573366 | XC_1710 | conserved hypothetical protein                        | ACG TTC ACC |         |             |
| <b>71</b> | 66573388 | XC_1733 | L-lysine 6-aminotransferase                           | CC ATT CATT |         |             |
| <b>72</b> | 66573394 | XC_1739 | protein-export membrane protein                       | AT GTT CACC |         |             |
| <b>73</b> | 66573454 | XC_1801 | chemotaxis protein                                    | AC ATT CAGG | 2189514 | AC GTT CACT |
| <b>74</b> | 66573460 | XC_1807 | conserved hypothetical protein                        | CC GTT CACG |         |             |
| <b>75</b> | 66573487 | XC_1834 | ABC transporter ATP-binding protein                   | TC GTT CATG |         |             |
| <b>76</b> | 66573495 | XC_1842 | conserved hypothetical protein                        | TC GTT CATG |         |             |
| <b>77</b> | 66573510 | XC_1857 | peptidase                                             | CC GTT CACC |         |             |
| <b>78</b> | 66573558 | XC_1905 | conserved hypothetical protein                        | CT GTT CACT |         |             |
| <b>79</b> | 66573562 | XC_1909 | transcriptional regulator lacI family                 | TT ATT CACG |         |             |
| <b>80</b> | 66573575 | XC_1922 | 50S ribosomal protein L36                             | TC ATT CAGG |         |             |
| <b>81</b> | 66573605 | XC_1952 | phosphoenolpyruvate synthase                          | CC ATT CAGC |         |             |
| <b>82</b> | 66573623 | XC_1970 | cation efflux system protein                          | CT GTT CACG |         |             |
| <b>83</b> | 66573687 | XC_2036 | conserved hypothetical protein                        | AT GTT CATC |         |             |
| <b>84</b> | 66573700 | XC_2049 | plasmid-related protein                               | TC ATT CATC |         |             |
| <b>85</b> | 66573705 | XC_2055 | conserved hypothetical protein                        | CC GTT CACC |         |             |
| <b>86</b> | 66573742 | XC_2096 | transcriptional regulator luxR/uhpA family            | TT ATT CACG |         |             |
| <b>87</b> | 66573745 | XC_2099 | pseudouridylate synthase                              | AT GTT CAGC |         |             |
| <b>88</b> | 66573754 | XC_2108 | single-stranded DNA binding protein                   | AC ATT CATT |         |             |
| <b>89</b> | 66573810 | XC_2164 | conserved hypothetical protein                        | CC GTT CACT |         |             |
| <b>90</b> | 66573856 | XC_2211 | outer-membrane lipoproteins carrier protein precursor | CC ATT CATC |         |             |
| <b>91</b> | 66573876 | XC_2231 | flagellar protein                                     | TC GTT CAGG |         |             |
| <b>92</b> | 66573877 | XC_2232 | flagellar protein                                     | AC GTT CACG |         |             |
| <b>93</b> | 66573890 | XC_2245 | flagellar protein                                     | TT ATT CATC |         |             |

|            |          |         |                                                                     |             |
|------------|----------|---------|---------------------------------------------------------------------|-------------|
| <b>94</b>  | 66573912 | XC_2267 | flagellar protein                                                   | CTG TTC ACC |
| <b>95</b>  | 66573944 | XC_2300 | chemotaxis protein                                                  | CCATTCATG   |
| <b>96</b>  | 66573950 | XC_2306 | chemotaxis protein                                                  | ACG TTC AGT |
| <b>97</b>  | 66573969 | XC_2326 | aconitate hydratase 2                                               | ACATTCACT   |
| <b>98</b>  | 66573975 | XC_2332 | RpfF protein                                                        | ACG TTC AGT |
| <b>99</b>  | 66573999 | XC_2356 | enoyl-CoA hydratase                                                 | CCATTCATG   |
| <b>100</b> | 66574010 | XC_2367 | cationic amino acid transporter                                     | CCATTCATG   |
| <b>101</b> | 66574019 | XC_2376 | phosphoribosylformimino-5-aminoimidazole carboxam                   | CTG TTC ACC |
| <b>102</b> | 66574028 | XC_2385 | conserved hypothetical protein                                      | ACG TTC AGC |
| <b>103</b> | 66574069 | XC_2429 | conserved hypothetical protein                                      | CTG TTC ACC |
| <b>104</b> | 66574077 | XC_2437 | hypothetical protein - Escherichia coli plasmid ColIa (fragment) gi | CTG TTC ACT |
| <b>105</b> | 66574113 | XC_2473 | conserved hypothetical protein                                      | ACG TTC ACT |
| <b>106</b> | 66574146 | XC_2506 | carbon storage regulator                                            | TCATTCAGG   |
| <b>107</b> | 66574162 | XC_2522 | lipoprotein                                                         | CCG TTC ATC |
| <b>108</b> | 66574184 | XC_2544 | general stress protein                                              | TTG TTC ACC |
| <b>109</b> | 66574188 | XC_2548 | conserved hypothetical protein                                      | CCG TTC ATG |
| <b>110</b> | 66574198 | XC_2558 | glycosyl transferase                                                | CTG TTC ACT |
| <b>111</b> | 66574202 | XC_2562 | cytochrome like B561                                                | ACG TTC ACC |
| <b>112</b> | 66574205 | XC_2565 | conserved hypothetical protein                                      | CCG TTC ACC |
| <b>113</b> | 66574218 | XC_2578 | response regulator                                                  | CCATTCAGG   |
| <b>114</b> | 66574220 | XC_2580 | endonuclease precursor                                              | CCATTCACT   |
| <b>115</b> | 66574264 | XC_2625 | IS1404 transposase                                                  | CTG TTC ACC |
| <b>116</b> | 66574312 | XC_2673 | asparaginyl-tRNA synthetase                                         | CTG TTC AGG |
| <b>117</b> | 66574349 | XC_2710 | ABC transporter phosphate permease                                  | TTG TTC ATC |

|            |          |         |                                                     |            |
|------------|----------|---------|-----------------------------------------------------|------------|
| <b>118</b> | 66574374 | XC_2735 | ABC transporter vitamin B12 uptake permease         | CTG TTCATG |
| <b>119</b> | 66574376 | XC_2737 | ABC transporter ATP-binding protein                 | ATG TTCATG |
| <b>120</b> | 66574407 | XC_2768 | outer membrane protein                              | CCG TTCATT |
| <b>121</b> | 66574409 | XC_2770 | conserved hypothetical protein                      | TTG TTCAGG |
| <b>122</b> | 66574419 | XC_2780 | phage-related integrase                             | ATG TTCAGT |
| <b>123</b> | 66574449 | XC_2810 | conserved hypothetical protein                      | TTG TTCAGG |
| <b>124</b> | 66574454 | XC_2815 | peptidoglycan-associated outer membrane lipoprotein | CCG TTCACC |
| <b>125</b> | 66574466 | XC_2827 | transcriptional regulator marR family               | CCATTCAGT  |
| <b>126</b> | 66574468 | XC_2829 | conserved hypothetical protein                      | TTG TTCATG |
| <b>127</b> | 66574479 | XC_2840 | transcriptional regulator marR family               | TTATTCATT  |
| <b>128</b> | 66574526 | XC_2888 | conserved hypothetical protein                      | ACG TTCATG |
| <b>129</b> | 66574538 | XC_2900 | methionyl-tRNA synthetase                           | ATG TTCACG |
| <b>130</b> | 66574547 | XC_2909 | conserved hypothetical protein                      | CCG TTCATC |
| <b>131</b> | 66574552 | XC_2914 | conserved hypothetical protein                      | ACG TTCATC |
| <b>132</b> | 66574558 | XC_2920 | conserved hypothetical protein                      | TTG TTCAGG |
| <b>133</b> | 66574559 | XC_2921 | conserved hypothetical protein                      | ATG TTCATG |
| <b>134</b> | 66574576 | XC_2938 | conserved hypothetical protein                      | TTATTCACG  |
| <b>135</b> | 66574602 | XC_2964 | RNA methyltransferase                               | ATG TTCATG |
| <b>136</b> | 66574661 | XC_3023 | HrpW protein                                        | CCATTCATC  |
| <b>137</b> | 66574708 | XC_3072 | positive regulator of sigma-B                       | ACG TTCAGC |
| <b>138</b> | 66574749 | XC_3113 | conserved hypothetical protein                      | TCG TTCACG |
| <b>139</b> | 66574795 | XC_3161 | excinuclease ABC subunit A                          | CTG TTCAGC |
| <b>140</b> | 66574804 | XC_3170 | oxidoreductase                                      | TCG TTCACC |
| <b>141</b> | 66574808 | XC_3174 | conserved hypothetical protein                      | CCG TTCACG |

|            |          |         |                                            |            |         |            |
|------------|----------|---------|--------------------------------------------|------------|---------|------------|
| <b>142</b> | 66574834 | XC_3200 | peroxiredoxin                              | ATG TTCATG | 3834475 | TTG TTCAGC |
| <b>143</b> | 66574869 | XC_3235 | conserved hypothetical protein             | CCATTCACC  |         |            |
| <b>144</b> | 66574881 | XC_3247 | molybdenum cofactor biosynthesis protein C | CCG TTCACC |         |            |
| <b>145</b> | 66574901 | XC_3267 | conserved hypothetical protein             | TCATTCACC  |         |            |
| <b>146</b> | 66574918 | XC_3284 | conserved hypothetical protein             | TCATTCAGG  |         |            |
| <b>147</b> | 66574929 | XC_3295 | ABC transporter sulfate binding protein    | CTG TTCAGG |         |            |
| <b>148</b> | 66574939 | XC_3305 | conserved hypothetical protein             | CCATTCAGC  |         |            |
| <b>149</b> | 66574942 | XC_3308 | peptidyl-prolyl cis-trans isomerase        | CCATTCAGG  |         |            |
| <b>150</b> | 66574985 | XC_3351 | 50S ribosomal protein L11                  | TTG TTCAGG |         |            |
| <b>151</b> | 66574989 | XC_3355 | GTP-binding protein                        | CCATTCACT  |         |            |
| <b>152</b> | 66574995 | XC_3361 | conserved hypothetical protein             | CCATTCAGG  | 4011473 | TTG TTCAGT |
| <b>153</b> | 66575053 | XC_3419 | transcriptional regulator marR family      | CCG TTCATG |         |            |
| <b>154</b> | 66575063 | XC_3429 | conserved hypothetical protein             | CTG TTCACC |         |            |
| <b>155</b> | 66575095 | XC_3461 | conserved hypothetical protein             | ACG TTCACC |         |            |
| <b>156</b> | 66575102 | XC_3468 | ribokinase                                 | ACG TTCATG |         |            |
| <b>157</b> | 66575105 | XC_3471 | methionine adenosyltransferase             | CCG TTCAGG |         |            |
| <b>158</b> | 66575138 | XC_3505 | cell division protein FtsZ                 | CCATTCACG  |         |            |
| <b>159</b> | 66575139 | XC_3506 | cell division protein FtsA                 | CCTTAATT   |         |            |
| <b>160</b> | 66575155 | XC_3522 | conserved hypothetical protein             | TTG TTCATT |         |            |
| <b>161</b> | 66575167 | XC_3534 | conserved hypothetical protein             | ACG TTCACC |         |            |
| <b>162</b> | 66575179 | XC_3546 | ABC transporter ATP-binding protein        | CCATTCAGG  |         |            |
| <b>163</b> | 66575236 | XC_3604 | flavoprotein-ubiquinone oxidoreductase     | ATG TTCATG |         |            |
| <b>164</b> | 66575242 | XC_3610 | dTDP-4-dehydrorhamnose reductase           | TTG TTCAGC |         |            |
| <b>165</b> | 66575258 | XC_3627 | putative GDP-mannose 4,6-dehydratase       | CCG TTCACC |         |            |

|            |          |         |                                            |           |
|------------|----------|---------|--------------------------------------------|-----------|
| <b>166</b> | 66575264 | XC_3633 | membrane subunit of LPS efflux transporter | TTGTTCAGG |
| <b>167</b> | 66575265 | XC_3634 | glycosyltransferase                        | CTGTTCACC |
| <b>168</b> | 66575266 | XC_3635 | cystathionine gamma-lyase-like protein     | CCATTCAGG |
| <b>169</b> | 66575272 | XC_3641 | maleylacetoacetate isomerase               | CCGTTCATG |
| <b>170</b> | 66575283 | XC_3652 | beta-ketoacyl-[ACP] synthase I             | ATGTTCACT |
| <b>171</b> | 66575323 | XC_3693 | conserved hypothetical protein             | TTGTTCAGG |
| <b>172</b> | 66575342 | XC_3712 | L-sorbose dehydrogenase                    | CTGTTCAGG |
| <b>173</b> | 66575343 | XC_3713 | conserved hypothetical protein             | TCGTTCACG |
| <b>174</b> | 66575365 | XC_3735 | DNA polymerase related protein             | ATGTTCAGC |
| <b>175</b> | 66575410 | XC_3780 | oxidoreductase                             | CTGTTCATG |
| <b>176</b> | 66575439 | XC_3809 | phosphinothricin acetyltransferase         | TTGTTCATC |
| <b>177</b> | 66575471 | XC_3841 | NADH dehydrogenase                         | ACATTCATT |
| <b>178</b> | 66575480 | XC_3850 | transcription termination factor Rho       | CCGTTCATT |
| <b>179</b> | 66575481 | XC_3851 | conserved hypothetical protein             | TTGTTCATG |
| <b>180</b> | 66575500 | XC_3870 | conserved hypothetical protein             | ACGTTCATT |
| <b>181</b> | 66575554 | XC_3925 | tyrosyl-tRNA synthetase                    | CTGTTCATT |
| <b>182</b> | 66575614 | XC_3985 | histone H1                                 | ACATTCAGC |
| <b>183</b> | 66575615 | XC_3986 | protease Do                                | TCGTTCAGC |
| <b>184</b> | 66575641 | XC_4012 | conserved hypothetical protein             | CCGTTCATC |
| <b>185</b> | 66575649 | XC_4020 | thymidylate kinase                         | TTGTTCAGT |
| <b>186</b> | 66575661 | XC_4032 | conserved hypothetical protein             | ATGTTCATT |
| <b>187</b> | 66575682 | XC_4053 | TonB-dependent receptor                    | TTGTTCATT |
| <b>188</b> | 66575716 | XC_4087 | beta-ketoacyl-[ACP] synthase II            | ACGTTCAGT |
| <b>189</b> | 66575762 | XC_4133 | transglycosylase associated protein        | CCGTTCAGC |



|            |          |         |                                       |            |         |            |
|------------|----------|---------|---------------------------------------|------------|---------|------------|
| <b>190</b> | 66575769 | XC_4140 | conserved hypothetical protein        | CCG TTCAGT |         |            |
| <b>191</b> | 66575850 | XC_4222 | transcriptional regulator lacI family | TCATTCATG  |         |            |
| <b>192</b> | 66575862 | XC_4234 | XmnI methyltransferase                | ATG TTCAGC |         |            |
| <b>193</b> | 66575918 | XC_4293 | microcystin dependent protein         | CCATTCACC  |         |            |
| <b>194</b> | 66575921 | XC_4296 | toluene tolerance protein             | ATG TTCAGC |         |            |
| <b>195</b> | 66575924 | XC_4299 | toluene tolerance protein             | ATG TTCAGT |         |            |
| <b>196</b> | 66575935 | XC_4310 | conserved hypothetical protein        | CTG TTCAGC |         |            |
| <b>197</b> | 66575952 | XC_4327 | Oar protein                           | CCG TTCAGG | 5138751 | TTG TTCAGG |
| <b>198</b> |          | XC_4352 | Cys tRNA                              | CCG TTCACT |         |            |
